# Supplementary material
Source: PubMed Central journal article supplement (PMC7745180)
Supplement: NEJMoa2031994_appendix.pdf [file NEJMoa2031994_appendix.pdf]

## Supplementary Appendix to Manuscript Entitled:

### **Baricitinib plus Remdesivir for the Treatment of Hospitalized Adults with COVID-19. A Randomized Double-blind Placebo-controlled Trial**

#### **Table of Contents:**

|                                                                                                                                                                                      |    |
|--------------------------------------------------------------------------------------------------------------------------------------------------------------------------------------|----|
| ACTT-2 Study Group .....                                                                                                                                                             | 3  |
| ACTT-2 Study Team Members .....                                                                                                                                                      | 8  |
| Supplemental Methods: .....                                                                                                                                                          | 19 |
| Additional Study Design Details .....                                                                                                                                                | 19 |
| Additional Study population Details.....                                                                                                                                             | 19 |
| Additional Study Procedures Details .....                                                                                                                                            | 20 |
| Additional Statistical Analysis Details .....                                                                                                                                        | 21 |
| Additional Sensitivity Analysis on Baseline Ordinal Score Category 6.....                                                                                                            | 21 |
| Interim Analysis Details .....                                                                                                                                                       | 21 |
| Registration at ClinicalTrials.gov .....                                                                                                                                             | 23 |
| Supplemental Tables and Figures: .....                                                                                                                                               | 24 |
| Table S1. Ordinal Scale .....                                                                                                                                                        | 24 |
| Table S2. Categorical Demographic and Baseline Characteristics by Treatment Group .....                                                                                              | 25 |
| Table S3. Continuous Demographic and Baseline Characteristics by Treatment Group .....                                                                                               | 29 |
| Table S4. Summary of Demographic and Clinical Characteristics at Baseline - US Sites .....                                                                                           | 31 |
| Table S5. Table of missing values for recovery, mortality and ordinal scale at Day 15 .....                                                                                          | 34 |
| Table S6. Primary analysis using “as randomized” disease severity.....                                                                                                               | 35 |
| Table S7. Serious Adverse Events Occurring in 5 or More Participants in Any Preferred Term by Treatment Group .....                                                                  | 36 |
| Table S8. Non-Serious Adverse Events Occurring in 5 or More Participants in Any Preferred Term by Treatment Group .....                                                              | 37 |
| Table S9. ACTT-2 results of Cox proportional hazards models testing for interactions between treatment effect and baseline ordinal score with respect to recovery and mortality..... | 39 |
| Table S10. Treatment Emergent Related Grade 3-4 AEs (Serious and Non-Serious) by MedDRA System Organ Class, Preferred Term and Treatment Group .....                                 | 40 |
| Table S11. Treatment Emergent Grade 3-4 AEs (Serious and Non-Serious) by MedDRA System Organ Class, Preferred Term and Treatment Group .....                                         | 41 |
| Table S12. Post-randomization corticosteroid use.....                                                                                                                                | 47 |
| Table S13. Sensitivity analysis of time to recovery with random effects for site .....                                                                                               | 47 |

|                                                                                                              |    |
|--------------------------------------------------------------------------------------------------------------|----|
| Table S14. Primary Analysis of Time to Recovery by Baseline Ordinal Score at Final Alpha Spending Look ..... | 48 |
| Table S15. Restricted Mean Survival Time Analysis .....                                                      | 49 |
| Table S16. Time to Recovery by Treatment Group and Baseline Ordinal Score: Fine-Gray Modeling .....          | 51 |
| Figure S1. Day 15 outcomes by baseline ordinal scale in the intent-to-treat population. ....                 | 52 |
| Figure S2. Kaplan–Meier Estimates of Survival by Baseline Ordinal Scale.....                                 | 53 |
| References:.....                                                                                             | 55 |

**ACTT-2 Study Group**  
**(listed in PubMed, and ordered by enrollment)**

The following study group members were all closely involved with the design, implementation, and oversight of the ACTT-2 study.

University of Texas Health San Antonio, University Health, and the South Texas Veterans Health Care System, San Antonio, TX. Thomas F. Patterson, M.D., Philip O. Ponce, M.D., Barbara S. Taylor, M.D., M.S., Jan E. Patterson, M.D., M.S., Jason E. Bowling, M.D., Heta Javeri, M.D.

University of Nebraska Medical Center, Omaha, NE. Andre C. Kalil, M.D., M.P.H., LuAnn Larson, BSN, Angela Hewlett, M.D., M.S.

Emory University, Atlanta, GA. Aneesh K. Mehta, M.D., Nadine G. Rouphael, M.D., Youssef Saklawi, M.D., Nicholas Scanlon, M.D., Jessica J. Traenkner, P.A.-C, Ronald P. Tribble Jr., M.D., Ph.D.

Duke University, Durham, NC. Emmanuel B. Walter, M.D., M.P.H., Noel Ivey, M.D., Thomas L. Holland, M.D., M.Sc

Instituto Nacional de Ciencias Médicas y Nutrición Salvador Zubiran, Mexico City, Mexico. Guillermo M. Ruiz-Palacios, M.D., Alfredo Ponce de León, M.D., Sandra Rajme, M.D.

University of California Irvine, Irvine, CA. Lanny Hsieh, M.D., Alpesh N. Amin, M.D., Miki Watanabe, MD, Helen S. Lee, Pharm.D., BCIDP.

University of Minnesota, Minneapolis, MN. Susan Kline, M.D., M.P.H., Joanne Billings, M.D., M.P.H., Brooke Noren, R.N., Hyun Kim, MD, Tyler D. Bold, MD, PhD.

Cedars Sinai Medical Center, Los Angeles, CA. Victor Tapson, M.D., Jonathan Grein, M.D., Fayyaz Sutterwala, M.D.

University of Florida Health-Shands Hospital, Gainesville, FL. Dr. Nicole Iovine, M.D., Lars K. Beattie, M.D., Rebecca Murray Wakeman, M.D., and Matthew Shaw, M.D.

UT Southwestern Medical Center, & Parkland Health & Hospital System, Dallas, TX. Mamta K. Jain, M.D., M.P.H., Satish Mocherla, M.D., Jessica Meisner, M.D., Amneris Luque, M.D.

University of California San Diego, La Jolla, CA. Daniel A. Sweeney, M.D., Constance A. Benson, M.D., Farhana Ali, M.D.

Baylor College of Medicine, Houston, TX. Robert L. Atmar, M.D., Hana M. El Sahly, M.D., Jennifer Whitaker, M.D.

University of Rochester Medical Center, Rochester, NY. Ann R. Falsey, M.D., Angela R. Branche, M.D., Cheryl Rozario, M.D.

Instituto Nacional de Enfermedades Respiratorias, Mexico City, Mexico. Justino Regalado Pineda, M.D. M.Sc., José Arturo Martínez-Orozco M.D.

National Centre for Infectious Diseases/Tan Tock Seng Hospital, Singapore. David Chien Lye, MBBS, Sean WX Ong MBBS, Po Ying Chia, MBBS, Barnaby E Young, MBBS

Baylor Scott & White Health, Dallas, TX. Uriel Sandkovsky, M.D., M.S, Mezgebe Berhe, M.D., M.P.H., Clinton Haley, M.D., M.P.H., Emma Dishner, M.D., M.P.H.

Grady Memorial Hospital, Atlanta, GA. Valeria D Cantos, M.D., Colleen F. Kelley, M.D., M.P.H., Paulina A. Rebolledo Esteinou M.D., M.Sc., Sheetal Kandiah, M.D., M.P.H.

University of California San Francisco, San Francisco, CA. Sarah B. Doernberg, M.D., Pierre-Cedric B. Crouch, Ph.D., R.N., ANP-BC, ACRN, Hannah Jang, Ph.D., R.N., CNL, PHN

Zuckerberg San Francisco General, San Francisco, CA. Anne F. Luetkemeyer, M.D., Jay Dwyer, RN.

Grady Memorial Hospital, Atlanta, GA. Valeria D Cantos, M.D., Colleen F. Kelley, M.D., M.P.H., Paulina A. Rebolledo Esteinou M.D., M.Sc., Sheetal Kandiah, M.D., M.P.H.

University of California Davis, Davis, CA. Stuart H. Cohen M.D., George R. Thompson 3rd, M.D., Hien H. Nguyen, M.D., M.A.S.

University of Massachusetts Medical School, Worcester, MA. Robert W. Finberg, M.D., Jennifer P. Wang, M.D., Juan Perez-Velazquez, MD, Mireya Wessollosky, M.D.

University of Virginia, Charlottesville, VA. Patrick E. H. Jackson M.D., Taison D. Bell, M.D., Miranda J. West, M.S.

Northwestern University, Chicago, IL. Babafemi Taiwo, M.B.B.S., Karen Krueger M.D., Johnny Perez,, RN, BSN., Triniece Pearson, PhD, MBA, RN, CCRC

Pennsylvania State Health Milton S. Hershey Medical Center, Hershey, PA. Catharine I. Paules, M.D., Kathleen G. Julian MD, Danish Ahmad MD, Alexander G. Hajduczuk MD

Providence Sacred Heart Medical Center, Spokane, WA. Henry Arguinchona M.D., Christa Arguinchona MSN, R.N., CCRN.

University of Alabama at Birmingham (UAB), Birmingham, AL. Nathaniel Erdmann M.D., Ph.D., Paul Goepfert M.D.

Stanford University, Stanford, CA. Neera Ahuja, M.D.

Denver Health and Hospital Authority, Denver, CO. Maria G. Frank, M.D, David Wyles, M.D., Heather Young, M.D.

Seoul National University Hospital, Seoul, Korea. Myoung-don Oh, M.D., Wan Beom Park, M.D., Chang Kyung Kang, M.D.

Atlanta VA Medical Center, Atlanta, GA. Vincent Marconi, M.D., Abeer Moanna, M.D., Sushma Cribbs M.D., Telisha Harrison, M.S.W.

Seoul National University Bundang Hospital, Seongnam, Korea. Eu Suk Kim, M.D., Jongtak Jung, M.D., Kyoung-Ho Song, M.D., Hong Bin Kim, M.D.

Changi General Hospital, Singapore. Seow Yen Tan, MBBS, Humaira Shafi, MBBS, Jaime MF Chien, MBBS, Raymond KC Fong, MBBS

Rigshospitalet, Dept. of Infectious Diseases (CHIP), Copenhagen, Denmark. Daniel D. Murray, Ph.D., Jens Lundgren, M.D.

Aalborg University Hospital, Dept. of Infectious Diseases, Denmark. Henrik Nielsen, M.D.

Nord Zealand University Hospital, Dept. of Infectious Diseases, Denmark. Tomas Jensen, M.D.

Montefiore Medical Center/Albert Einstein College of Medicine, Bronx, NY. Barry S. Zingman, M.D., Robert Grossberg, M.D., Paul F. Riska, M.D.

University of California Los Angeles, Los Angeles, CA. Otto O. Yang M.D., Jenny Ahn R.N. B.S.N., Rubi Arias B.A.

University of Maryland School of Medicine, Baltimore, MD. Rekha R. Rapaka, M.D. Ph.D., Naomi Hauser, M.D., James D. Campbell, M.D., M.S.

University of Pennsylvania, Philadelphia, PA. William R. Short, M.D. M.P.H., Pablo Tebas, M.D., Jillian T. Baron, M.D., M.P.H.

University of Texas Medical Branch, Galveston, TX. Susan L. F. McLellan MD, MPH, Lucas S. Blanton, MD, Justin B. Seashore MD

Vanderbilt University Medical Center, Nashville, TN. C. Buddy Creech, M.D., M.P.H., Todd W. Rice, M.D., MSCI; Shannon Walker, MD; Isaac P. Thomsen, MD, MSCI

Evergreen Health Medical Center, Kirkland, WA. Diego Lopez de Castilla, M.D. M.P.H., Jason W. Van Winkle M.D., Francis X. Riedo M.D.

Ng Teng Fong General Hospital, Singapore. Surinder Kaur Pada, M.D., MBBS, MPH, Alvin DY Wang, MBBS, Li Lin, MD

University of New Mexico Health Sciences Center, Albuquerque, NM. Michelle Harkins, M.D. Gregory Mertz MD, Nestor Sosa MD

National University Hospital, Singapore. Louis Yi Ann Chai, MBBS, PhD, Paul Anantharajah Tambyah, MBBS, Sai Meng Tham, MBBS, Sophia Archuleta, M.D., Gabriel Yan, MBBS

Brooke Army Medical Center; and IDCRP, USUHS, San Antonio, TX. David A. Lindholm, M.D., Ana Elizabeth Markelz, M. D.

IDCRP, USUHS; HJF; and Brooke Army Medical Center, San Antonio, TX. Katrin Mende, Ph.D.

Kaiser Permanente Northwest, Portland, OR. Richard Mularski, M.D., M.S.H.S, M.C.R.

Massachusetts General Hospital, Boston, MA. Elizabeth Hohmann, M.D., Mariam Torres-Soto MA and Nikolaus Jilg M.D. Ph.D.

Naval Medical Center, San Diego; and IDCRP, USUHS, San Diego, CA. Ryan C. Maves, M.D.

IDCRP, USUHS; HJF; and Naval Medical Center San Diego, San Diego, CA. Gregory C. Utz, M.D.

Saint Louis University, Saint Louis, MO. Sarah L. George, M.D., Daniel F. Hoft, M.D., Ph.D., James D. Brien, Ph.D.

Hospital Germans Trias i Pujol, Badalona, Spain. Roger Paredes, M.D., Ph.D., Lourdes Mateu, M.D., Ph.D., Cora Loste, M.D.

Georgetown University, Washington, DC. Princy Kumar, M.D., Sarah Thornton, MD  
Sharmila Mohanraj, MD

Johns Hopkins University School of Medicine, Baltimore, MD. Noreen A. Hynes, M.D., M.P.H.,  
Lauren M. Sauer, M.S.

Madigan Army Medical Center; and IDCRP, USUHS, Tacoma, WA. Christopher J. Colombo,  
M.D., M.A., Christina Schofield, M.D.

IDCRP, USUHS; HJF; and Madigan Army Medical Center, Tacoma, WA. Rhonda E. Colombo,  
M.D., M.H.S.

IDCRP, USUHS, Bethesda, MD; HJF, Bethesda, MD; and Madigan Army Medical Center,  
Tacoma WA. Susan E Chambers, B.S.N., R.N.

University of Illinois at Chicago, Chicago, IL. Richard M. Novak, M.D., Andrea Wendrow RPh  
Indiana University, Indianapolis, IN. Samir K. Gupta, M.D.

Naval Medical Center Portsmouth; and IDCRP, USUHS, Portsmouth, VA. Tida Lee, M.D.,  
Ph.D.

IDCRP, USUHS; HJF; and Naval Medical Center Portsmouth, Portsmouth, VA. Tahaniyat  
Lalani, M.B.B.S., M.H.S.

VA Palo Alto Health Care System, Palo Alto, CA. Mark Holodniy, M.D., Aarthi Chary, M.D.

Walter Reed National Military Medical Center; and Infectious Disease Clinical Research  
Program (IDCRP), Uniformed Services University of the Health Sciences (USUHS), Bethesda,  
MD. Nikhil Huprikar, M.D.

IDCRP, USUHS; Henry M. Jackson Foundation for the Advancement of Military Medicine, Inc.  
(HJF); and Walter Reed National Military Medical Center, Bethesda, MD. Anuradha Ganesan,  
M.B.B.S., M.P.H

National Center for Global Health and Medicine Hospital, Tokyo, Japan. Norio Ohmagari, M.D.,  
Ph.D, Ayako Mikami, M.D., Ph.D.

Royal Victoria Infirmary, Newcastle, United Kingdom. D. Ashley Price, MRCP; Christopher J.  
A. Duncan, MRCP.

NYU Langone Health and NYC Health + Hospitals/ Bellevue, New York City, NY. Kerry  
Dierberg, M.D. M.P.H., Henry J Neumann, M.D.

Ochsner Medical Center Kenner, Kenner, LA. Stephanie N. Taylor, M.D., Alisha Lacour, M.D.,  
Najy Masri, M.D.

Southeast Louisiana Veterans Health Care System, New Orleans, LA. Edwin Swiatlo, M.D.,  
Kyle Widmer, M.D.

University of Minnesota, School of Public Health and INSIGHT, Minneapolis, MN. James D.  
Neaton, Ph.D.

Veterans Affairs Eastern Colorado Healthcare System, Aurora, CO. Mary Bessesen, M.D.

Infectious Diseases Clinical Research Consortium (IDCRC), Emory University, Atlanta, GA.  
David S. Stephens, M.D.

Infectious Disease Clinical Research Program, Uniformed Services University of the Health Sciences, Bethesda, MD. Timothy H. Burgess, M.D. M.P.H.

US Centers for Disease Control and Prevention Atlanta, GA. Timothy M Uyeki, M.D. M.P.H

Biomedical Advanced Research and Development Authority, Washington, DC. Robert Walker, M.D., G. Lynn Marks, M.D

Gilead Sciences, Foster City, CA. Anu Osinusi, M.D. M.P.H., Huyen Cao, M.D.

Eli Lilly, Indianapolis, IN. Anabela Cardoso, M.D., M.B.A., Stephanie de Bono, M.D. Ph.D., Douglas E Schlichting

Uniformed Services University of the Health Sciences, Bethesda, MD. Kevin K. Chung, M.D.

The Emmes Company, LLC, Rockville, MD. Jennifer L. Ferreira, ScM; Michelle Green, MPH, MBA; Mat Makowski, PhD; Michael R. Wierzbicki, PhD; Tom M. Conrad, PhD; Jill Ann El-Khorazaty, MS; Heather Hill M.S.

Clinical Monitoring Research Program Directorate, Frederick National Laboratory for Cancer Research, Frederick, MD. Tyler Bonnett, M.S., Nikki Gettinger M.P.H, Theresa Engel, M.F.S., Teri Lewis, B.S., Jing Wang M.S.

National Institute of Allergy and Infectious Diseases, National Institutes of Health, Bethesda, M.D. John H. Beigel, M.D., Kay M. Tomashek, M.D., M.P.H., Varduhi Ghazaryan, MD. MPH., Tatiana Beresnev, M.D. Seema Nayak, M.D., Lori E. Dodd, Ph.D., Walla Dempsey, Ph.D., Effie Nomicos R.N., M.S.N., Marina Lee, Ph.D., Rhonda Pikaart-Tautges, Mohamed Elsafy M.D., Robert Jurao, R.N, B.S.N., Hyung Koo, R.N., BSN, Michael Proschan, Ph.D., Tammy Yokum, M.S.N., R.N., Janice Arega, M.S., Ruth Florese, MPH, PhD., Jocelyn D. Voell, R.N., M.S., Richard Davey, M.D.

### **ACTT-2 Study Team Members**

The ACTT-2 study was a significant collaborative effort across many countries, networks and sites. Below is a list of sites and staff that worked tirelessly to implement and execute the ACTT-2 Trial (by country).

#### **Denmark**

Rigshospitalet, Dept. of Infectious Diseases (CHIP), Copenhagen, Denmark. Jens Lundgren, M.D., Marie Helleberg, M.D., Jan Gerstoft, M.D.

Aalborg University Hospital, Dept. of Infectious Diseases, Denmark. Henrik Nielsen, M.D.

Nord Zealand University Hospital, Dept. of Infectious Diseases, Denmark. Tomas Jensen, M.D.

#### **Japan**

National Center for Global Health and Medicine Hospital, Tokyo, Japan. Norio Ohmagari, M.D., Ph. D, Ayako Mikami, M.D., Ph. D., Sho Saito, M.D., Shinyu Izumi, M.D., Ph. D., Kayoko Hayakawa, M.D., Satoshi Kutsuna, M.D., Mugen Ujiie, M.D., Noriko Kinoshita, M.D., Kei Yamamoto, M.D., Masahiro Ishikane, M.D., Shinichiro Morioka, M.D., Jin Takasaki, M.D., Manabu Suzuki, M.D., Masao Hashimoto, M.D., Keita Sakamoto, M.D., Takashi Katsuno, M.D., Yusaku Kusaba, M.D., Akinari Tsukada, M.D., Yoh Yamaguchi, M.D., Hiroshi Takumida, M.D., Chie Morita, M.D., Hiromu Watanabe, M.D., Yoshie Tsujimoto, M.D., Kenji Maeda, M.D., Ph. D ,Hattori Shin-ichiro, Ph. D, Yukari Uemura, Ph. D, Ayumi Mizukami, M.D., Yuichiro Takeda, M.D., Ph. D, Hideki Funazaki, Pharmacist, Terumi Marutani, Pharmacist, Satomi Kojima, R.N., Rie Makishima, R.N., Aki Izumikubo

#### **Korea**

Seoul National University Hospital, Seoul, Korea. Myoung-don Oh, M.D., Pyoeng Gyun Choe, M.D. M.P.H, Chang Kyung Kang, M.D. Nam Joong Kim, M.D., Wan Beom Park, M.D. Heyjin Kim, R.N., Juen Lee, R.N. Hongwon Jang, MSc, Su Jin Choi., M.Sc, Areum Jo, M.S.

Seoul National University Bundang Hospital – Bundang, Seongnam, Korea. Eu Suk Kim, M.D. Jongtak Jung, M.D., Kyoung-Ho Song, M.D., Hong Bin Kim, M.D., Sin Young Ham, M.D., Hyeonju Jeong, M.D., Sang-Min Oh, M.D., Young-Jae Cho, M.D., Sung Yoon Lim, M.D., Yeon Joo Lee, M.D., Myung Jin Song, M.D., Jeong Su Park, M.D., Kyoung Un Park, M.D., Jiyoung Kwak, R.N., Junghee Kim, R.N., Yun Jung Choi, Kyungmi Kwon, Seonmee Kang, Younghee Im, R.N., Hyunkyong Lee, R.N.

#### **Mexico**

Instituto Nacional de Ciencias Médicas y Nutrición Salvador Zubirán, Mexico City, Mexico. Guillermo M. Ruiz-Palacios, M.D., Alfredo Ponce de León, M.D., Sandra Rajme, M.D.



Instituto Nacional de Enfermedades Respiratorias, Mexico City, Mexico. Justino Regalado Pineda, M.D. M.Sc., José Arturo Martínez-Orozco M.D.

The Mexican Emerging Infectious Diseases Clinical Research Network (LaRed). Abelardo Montenegro, M.D., Paola Guerra, PhD., Luis Mendoza Garces.

### **Singapore**

National Centre for Infectious Diseases/Tan Tock Seng Hospital/Lee Kong Chian School of Medicine/Yong Loo Lin School of Medicine, Singapore, Singapore. David Chien Lye, MBBS, Sean WX Ong, MBBS, Li Min Ling, MBBS, Po Ying Chia, MBBS, Barnaby E Young, MBBS, Ser Hon Pua, MBBS, Ray J Lin, MBBS, Tsin Wen Yeo, MBBS, PhD, Ying Ding, MD, PhD, Jonathan JC Lim, Eshel A Libau, Tat Ming Ng, PharmD, Hui Lin Tay, MSc, Kwee Haan Ng, BSc, Anne HT Neo, BSc.

Ng Teng Fong General Hospital, Singapore. Surinder Kaur Pada, MBBS, MPH, Alvin DY Wang, MBBS, Li Lin, MD, Shilpa Mukherjee, Amelia Jing Jing Ng, Christina Fui Chung Wong

National University Hospital, Singapore. Louis Yi Ann Chai, MBBS, PhD, Paul Anantharajah Tambyah, MD, Sai Meng Tham, MBBS, Sophia Archuleta, MD, Gabriel Yan, MBBS, Timothy Chern Pang Chia, Jingwen Chua, Hui Hiong Chen, Joy Yong, Melissa Ngai, Darren Zhen Zhong Teo, Yin Shan Lim, Si Min Au Yeong, Jansen Her

Changi General Hospital, Singapore. Seow Yen Tan, MBBS, Humaira Shafi, MBBS, Jaime MF Chien, MBBS, Raymond KC Fong, MBBS, Ju Yuan Toh, Siew Yoon Yap, Geraldine Lim, Charlene Ong, Siao Ching Gooi, Yee Ding Ng, Vivian JQ Sim, Bruce YJ Wong

### **Spain**

Barcelona Institute for Global Health (ISGlobal) Hospital Clínic - Universitat de Barcelona, Barcelona, Spain. Jose Muñoz, M.D., Ph.D., Montserrat Roldan R.N., Natalia Rodriguez MD, Almudena Legarda, BVSc.

Hospital Germans Trias i Pujol, Badalona, Catalonia, Spain. Roger Paredes, M.D., Ph.D, Lourdes Mateu, M.D., Ph.D, Cora Loste, M.D., José Ramón Santos, M.D., Laura Soldevila, M.D., Lucía Bailón, M.D., Boris Revollo, M.D., Ph.D, Patricia Cobarsi, B.Sc., Cristina Miranda, B.Sc.

Hospital Clinic San Carlos, Madrid, Spain. Vicente Estrada M.D., Ph.D., Noemi Cabello M.D., Maria Jose Nunez-Orantos M.D., Inigo Sagastagoitia, M.D., Rocio Segoviano, MD.

### **United Kingdom**

Churchill Hospital, Oxford, United Kingdom. Brian Angus, FRCP; Jack David Germain Seymour, BSc (Hons)

Guy's & St. Thomas' NHS Foundation Trust, London, United Kingdom. Anna Goodman, FRCP, DPhil; Chris Meadows FRCP.

Royal Sussex County Hospital, Brighton, United Kingdom. Martin Llewelyn, FRCP; Barbara Philips, FRCP.

Royal Victoria Infirmary, The Newcastle Hospitals NHS Foundation Trust, Newcastle, United Kingdom. D Ashley Price, MRCP; Christopher J A Duncan, MRCP.

St James's University Hospital, Leeds, United Kingdom. Fiona McGill, FRCP; Jane Minton, FRCP.

## **United States**

Atlanta VA Medical Center, Atlanta, GA. Vincent Marconi, M.D., Abeer Moanna, M.D., Sushma Cribbs M.D., Telisha Harrison, M.S.W., Amy Anderson R.N., Theron Clark-Stuart, Jane Guidot R.N., Linda M. Skinner Frazier, CPhT, Mehran S. Salles, Ph.D., Pharm.D., Boghuma Titanji M.D., Ph.D., Christina Gavegnano Ph.D., Monica Farley, M.D., Kathy DeSilva, Pharm.D., Raymond F. Schinazi Ph.D.

Baylor College of Medicine, Houston, TX. Hana M. El Sahly, M.D., Robert L. Atmar, M.D. Jennifer Whitaker, MD, Wendy A. Keitel MD, Marion Hemmersbach Miller MD, Robert Parkerson, MD, Annette Nagel, RN.

Baylor Scott & White Health, Dallas, TX Uriel Sandkovsky, M.D., M.S, Mezgebe Berhe, M.D., M.P.H., Clinton Haley, M.D., M.P.H., Emma Dishner, M.D., M.P.H., Christopher Bettacchi, M.D. , Rahaf Al Masri, M.D., Aaron Kilian, PharmD BCPS, , Edilia Solis, PharmD, Adriana Palacios, M.S., PharmD, Sarah Burris, MHA, Priscilla Diaz, CRC, Felecia Jones, CRC, Tanqunisha Coleman, CRC, Samantha Wang, BSN, RN, Samantha Villa, CRC, Maris Adams, CRC, Iram Nazia, MBBS, CCRC, Robin Buckner, LVN, CCRC, Diana Robinson, LVN, CCRC.

Brooke Army Medical Center, San Antonio, TX. David A. Lindholm, M.D.; Katrin Mende, Ph.D.; Ana Elizabeth Markelz, M.D.; Stephanie De Leon, M.S.; Veronica Wimberly, R.N.; Christopher Diaz, B.S.; Amy Swarthout-Ebarb, R.N.; BarBea Clakley; Scott Merritt; Cristina Martinez; Sanjuanita Medina; Alyssa Leal; Teresa Merritt, B.S.; Joanne Holloway, R.N.; Susan Kaiser, M.T.; Fernando Juarez; Miriam L. Beckius, MPH; Irene Lo, PharmD; Joseph Yabes, M.D.

Cedars Sinai Medical Center, Los Angeles, CA. Victor Tapson, M.D., Susan Jackman, R.N., M.S., Niree Hindoyan, B.S., Ethan Pascual, M.A., Lisa Herrera, Gwendolyn Weissberg, B.S., Katherine Isip, B.S.

Denver Health and Hospital Authority, Denver, CO. Maria G. Frank, M.D., Amy Irwin, R.N., D.N.P., David Wyles, M.D., Ellen Sarcone, M.D., Heather Young, M.D., Sarah Rowan, M.D., Casey Melvin, PharmD., Amy Keith, M.P.H., Kevin Kamis, M.P.H., Sarah Giddins M.T. (ACSP), Irina Yushkevich

Duke University, Durham, NC. Cameron Wolfe, M.B.B.S., M.P.H., Emily R. Ko, M.D., Ph.D., John J. Engemann, M.D., Emmanuel B. Walter, M.D., M.P.H., Noel Ivey, M.D., Thomas L.

Holland, M.D., M.Sc., M. Anthony Moody, M.D., Lynn Harrington, B.S.N., Lori Hendrickson, B.S.N., Kelly Clark, B.A., Beth McLendon-Arvik, Pharm.D.

Veterans Affairs Eastern Colorado Health Care System, Aurora, CO. Mary Bessesen, M.D., Robert Keith, M.D., Jill Adams, MSN, FNP-BC

Emory University, Atlanta, GA. , Timothy Ackey, CPhT, Ghina Alaaeddine, MD, LaCarles Allen, BS, Dee Anderson, CPhT, Evan Anderson, MD, Amer Bechnak, MD, Nour Beydoun, MD, Mary Bower, RN, BSN, Laurel R. Bristow, MSc, Andrew Cheng, BA, Caroline Ciric, BS, Matthew H Collins, MD, PhD, Blair P. Curless, PharmD, PhD, Tigisty Girmay, RN, BSN, MSN, Rebecca Feng Gonzalez, PharmD, Rachel J. Friedman-Moraco, MD, Lisa Harewood, BA, Kieffer Hellmeister, BS, Christopher Huerta, BS, , Laila Hussaini, MPH, Hannah Huston, Brandi Johnson, BS, Vinit Karmali, MSc, Ariel Kay, MPH, Dean Kleinhenz, MBA, Jennifer Kleinhenz, BS, Mai Koi, BS, Colleen S. Kraft, MD, MSc, Cindy Lubbers, RN, G. Marshall Lyon, MD, MSc, Hollie Macenczak, RN, BSN, Michele McCullough, MPH, Nina McNair, BS, Aneesh K. Mehta, MD, Juliet Morales, BS, Phillip M Murray, Tuong-Vy N Ngo, PharmD, Bernadine Panganiban, BS, Esther Sue Park, PharmD, Varun K. Phadke, MD, Emily Presmanes, PA-C, Stephanie Ramer, BS, Daniel Reichman, PA-C, Bruce S Ribner, MD, MPH, Nadine G Roupheal, MD, Susan Rogers, RPh, Youssef Saklawi, MD, Nicholas Scanlon, MD, Erin Scherer, PhD, DPhil, Robert Shepard, PharmD, Amy C. Sherman, MD, Tae Stallworth, BS, Megan Taylor, BS, Jessica Traenkner, PA-C, Ronald Tribble, MD, PhD, Jennifer Truell, MA, MPH, Jacob Usher, BS, Jesse Waggoner, MD, Dongli Wang, BS, Michelle Wiles, RN, BSN, MPH, Zanthia Wiley, MD, Juton Winston, BS, Terra Winter, CIP, Kim A. Workowski, MD., Grace Xu, Jianguo Xu, RPh, PhD, Yongxian Xu, MD, Cecilia X. Zhang, MA, MS.

Evergreen Health Medical Center, Kirkland, WA. Diego López de Castilla, M.D., M.P.H, Jason W. Van Winkle M.D., Francis X. Riedo M.D., Anhaita Jamula, C.C.R.C., Canan Akture, M.D., Darinka C. Obradovich, RN-BSN, BS, CEN, Matthew C. Eckles, BSc, Celeste M. Etherington, DNP, MBA, Leann Hatton, RN-BSN, Roxanne Raubacher, RN- BSN, CEN, Chhang Chhay, PharmD, MHA, BCPS, Gregory J. Lang, R.Ph. B.S. Pharm., Sherry Alboucq, B.Sc, CRCP, Bentolhoda Atef, MD, Jesica D. Baran, MD, Keith Brandt, RPSGT, Lynn LaBoda, BS, Ali Mufrej, M.B.Ch.B, Kristine A Vander Hart, CMA, Justin Wang, Parvin J. Kara RN.

Georgetown University, Washington, DC. Princy Kumar, M.D., Sarah Thornton, MD Sharmila Mohanraj, MD

Grady Memorial Hospital, Atlanta, GA. Catherine Abrams, RN, Alexis Ahonen, RN, MSN, NP-C, Katherine Al-Haroun, ANP, David Bower, MD, Juliet Brown, BS, Valeria D Cantos, MD, Carlos Del Rio, MD, Annette Esper, MD, KaRon Gaston, BS, John Gharbin, MBChB, MPH, Valarie Hunter, Rondell Jaggars, PharmD, Sheetal Kandiah, MD, MPH, Colleen F. Kelley, MD, MPH, Michael Mattaliano, PharmD, Caitlin Moran, MD, MSc, , Philip Powers PharmD, Paulina Rebolledo Esteinou, MD, MSc, Rotrease Regan, RN, MPH, PhD, Christin Root, BS, Joseph Torrisi, PharmD, Anandi Sheth, MD, MSc, Felicia Wright, ChPhT,.

Indiana University, Indianapolis, IN. Samir K Gupta, MD; Heather J Adams RN, BSN, CCRC; Meghan Willig, BSN, RN, CCRN; Annette Head, RPh; Ian A SerVaas, MA, CCRP; Paul A Sparks, MS

Johns Hopkins University School of Medicine, Baltimore, MD. Noreen A. Hynes MD, MPH; Lauren M. Sauer MS; Anna P. Durbin, MD; Kawsar R. Talaat, MD; Annukka A. R. Antar, MD, PhD; Brian T. Garibaldi, MD, MEHP; Manisha M. Hong, Pharm.D; Jade B. Flinn, MSN, RN, CCRN, CNRN; Alaina N. Hergenroeder, BS; Sabrina L. Drayton, BS; Rachel E. Rokser, MPAS, PA-C; Anna S. Ciambuschini, RN, BSN; Suzanne Woods, RN, CRNP-P; Jocelyn San Mateo, RN, MSN, CRNP-F; Kristi Herbert, RN, MSN, CRNP-P

Kaiser Permanente Northwest, Portland, OR. Richard Mularski, M.D. M.S.H.S, M.C.R.; Steven J. Spindel, M.D.; Jennifer E. Cook, MBA; Stephen P. Fortmann, M.D.; Britta Torgrimson-Ojerio, Ph.D., R.N.; Eric C. Walter, M.D., M.Sc.; Emily E. Shield, R.N., B.S.N.; Britt E. Ash, R.N., B.S.N.; P. Anne Ramey, R.N., M.N.; Madeline R. Peyton, M.P.H.; Tracy A Barton, RPH.; Jocelyn G. Mason, Pharm. D.; Katherine R. Gazley, Pharm. D.; Mica A Werner, M.S.M; Lindy E Maus; Keith B. Riley, M.D; Andrew J. Leitz, M.D.; Katie A. Sharff, M.D.; Molly S. Stenzel, M.D.; Holly E. Vanni, M.D.; Dorothy Kurdyla RN, MSN; Debra Ghioni; Jennifer Gluth

Madigan Army Medical Center, Tacoma, WA. Christopher J. Colombo, M.D., M.A.; Rhonda E. Colombo, M.D., M.H.S; Susan Chambers, B.S.N., R.N.; Janell Cain, M.S.; Miranda Heilweil, B.S.; Michelle Martin, A.S.; Shari Aynes, R.N.; Cynthia Baker, R.N.; Kimberly Taylor Blair, R.N.; Ashley Cochran; Wesley Robb-McGrath, B.S.; Constance Baum, B.S. Christina Schofield, M.D.; Tomas Ferguson, M.D.; Paul Faestel, M.D., M.P.H.; Cristin Mount, M.D.; Deanna Musfeldt M.D.; Peter Henning, M.D., Kyle Everson, M.D.; Steffen Lis M.D.; Christian Conlon, M.D.; Patrick Riley Smith, D.O.; Kristina Ieronimakis, B.S.N., R.N.; Hee-Won Patten, PharmD, M.B.A., April Azzarello, PharmD, BCPS ; Alex Vondracek PharmD, BCPS

Massachusetts General Hospital, Boston, MA. Elizabeth Hohmann, M.D, Nikolaus Jilg M.D. PhD, Mariam Torres Soto, MA, Fiona Evans, Jenny Lam Pharm. D.

Montefiore Medical Center/Albert Einstein College of Medicine, Bronx, NY. Barry S. Zingman, M.D., Freda Afrifa, Pharm.D., Sean Durant, Robert Grossberg, M.D., Kareen Jimenez, M.P.H., Sharon I. Lee, Pharm.D., Shaundell Nardin, M.H.S., Bola Omotosho, MBChB, CCRP, Paul F. Riska, M.D., Julie Sarlo, R.P.A.-C, Clemencia Solorzano, Pharm.D.

Naval Medical Center, Portsmouth, VA. Tida Lee M.D. Ph.D; Karl C. Kronmann M.D.; Tahaniyat Lalani M.B.B.S., M.H.S.; Richard T. Gendron PharmD; Jeffrey Eickhoff, M.D.; Janet McNiff B.S.N., R.N.; Susan Banks M.S.H.S., B.A., R.N.; Rezalina Tant M.S.

Naval Medical Center, San Diego, San Diego, CA. Ryan C Maves, M.D.; Gregory C. Utz, M.D.; Stephanie Cammarata, M.P.H.; Ashley Hughey, B.A.; Krystal Caluza; Geri Zollicoffer, M.S.N., R.N.; Carolyn Brandt, B.S.N., R.N. Natalie Hall, PharmD; Konrad Davis, M.D.; Terrence Kilfoil, M.D.; Jason Weiner, M.D.; John S. Parrish, M.D.; Catherine Berjohn, M.D.; Syed Husain, PhD.

National Institute of Allergy and Infectious Diseases, Bethesda, MD. Richard T Davey, Jr., M.D., Jocelyn D. Voell, R.N., Jeffrey R. Strich, M.D., Daniel S. Chertow, M.D., Anthony F. Suffredini, M.D., Robert L. Danner, M.D., Nitin Seam, M.D., Lev Agarunov, M.D., Veronique

R. Nussenblatt, M.D., Zana Blaku, Pharm.D., Benjamin Colton, PharmD., Michael Solomon, M.D., Amisha Barochia, M.D., Lindsay M. Busch, M.D., Ifeanyi-chukwu U. Anidi, M.D. Ph.D., Michael B. Keller, M.D., Willard N. Applefeld, M.D., Jason M. Elinoff, M.D., Sameer S. Kadri, M.D., Samuel B. Brusca, M.D., Janhavi Athale, M.D., Jeffrey Wang, M.D., Patricia Sterlin, NP, and Therese Kent, NP

Northwestern University, Chicago, IL. Babafemi Taiwo M.B.B.S., Karen Krueger, M.D., Baiba Berzins M.P.H., Johnny Perez R.N., Rachelle D. Price M.P.H., Triniece Pearson Ph.D., M.B.A., R.N., C.C.R.C., Sherrie Wolfe R.N.

NYU Langone Health and NYC Health + Hospitals/ Bellevue, New York City, NY. Kerry Dierberg, M.D. M.P.H., Ellie Carmody, MD, MPH; Benjamin Eckhardt, MD, MS; Sarah Hochman, MD; Henry J Neumann, MD;

Ochsner Medical Center Kenner, Kenner, LA, and Ochsner Medical Center Main Campus, New Orleans, LA. Catherine L. Cammarata, MT(ASCP), Bennett deBoisblanc, M.D., Julia Garcia-Diaz, M. D., Geralyn Isaac, PharmD, Karl Gotzkowsky, PharmD

Pennsylvania State Health Milton S. Hershey Medical Center, Hershey, PA. Catharine I. Paules MD, Kathleen G. Julian MD, Alexander G. Hajduczuk MD, Danish Ahmad MD, Muhammad Khalid MD, Tonya J Crook MD, Rebecca Bascom MD, Donna Griffiths RN, Mary M. Vogt, BS, RRT, Max Whitehead-Zimmers BA, Christie Schaeffer RN, CCRC, Terry Novchich RN, BSN, CRC, Alyse Fazzi, Pharm D, , Gabriela Uribe PhD, Nicholas T. Streck PhD, Wallace H. Greene PhD

Providence Sacred Heart Medical Center, Spokane, WA. Henry Arguinchona MD, Christa Arguinchona MSN, RN, CCRN

Saint Louis University, Saint Louis, MO. Sarah L. George, M.D., Daniel F. Hoft, M.D. Ph.D., James D. Brien Ph.D.

Southeast Louisiana Veterans Health Care System, New Orleans, LA. Edwin Swiatlo, M.D. Kyle Widmer, MD Mary Fournet, RN.

Stanford University, Stanford, CA. Neera Ahuja, MD; Kari Nadeau, MD, PhD, David Svec, MD, Rita Pandya, MD, MD, Nidhi Rohatgi, MD, MS, Jeff Chi, MD, Evelyn Ling, MD, Minjoung Go, MD, Sharon Chinthrajah, MD, Andre Kumar, MD, Jasmine LaCoursiere, MS, Brynn Kron, Ali Dehnad, MBBS, Ahsan Kahn.

University of Alabama at Birmingham (UAB), Birmingham, AL. Nathaniel Erdmann MD, PhD, Paul Goepfert MD, Alisa Peinhart MAIS, BSN, OCN, Melissa Garner BSN, RN, Chris Chapleau PharmD, PhD, Jenna Weber RN, Latasha Vereen RN, Rachel McMullen BS, CCRP

University of California Davis, Davis, CA. Stuart H Cohen, MD, George R. Thompson 3<sup>rd</sup>, MD, Melony Chakrabarty MD, Scott Crabtree, MD, Sarah Waldman MD, Katelyn Trigg, MPH, Melina Sneesby, BS, Mohamad Kahil, BS, Yasmeen Rezaishad, BS.

University of California Irvine, Irvine, CA. Lanny Hsieh, M.D. Alpesh N. Amin, M.D., Miki Watanabe, M.D., Helen S. Lee, Pharm.D., BCIDP, Florence St-Onge, MS, Herlinda Bergman, BA, CCRP, Beverly L. Alger, M.D., CHRC, CCRP, Brian Strong, BSN, RN, George Orate, BSN, RN, CCRN, Van Le, MSN, RN, NE-BC, Gregory Mignano, MS, RN, CNN, Peter Horvath, Ph.D.,

Frank Zaldivar, Ph.D., Melanie D. Joe, Pharm.D., M.P.A., FCSHP, Zahra Azadbadi, Pharm.D., CLS, Shirin Golzari, Pharm.D., Dennis Laswardi, RPh, Stacy L. Yang, MSc., Pharm.D, BCSCP, Martin Torres, Pharm.D., Mark Baje, Pharm.D, BCCCP, Robert J. Eastin, Pharm.D., Rosemarie Boward, Pharm.D.

University of California Los Angeles, Los Angeles, CA. Otto O. Yang, M.D., Jenny Ahn RN BSN, Paul Allyn MD, Jesse Clark MD, Jennifer Fulcher MD PhD, Jaime Deville MD, Tara Vijayan MD, Kavitha Prabaker MD, Paul Krogstad MD, Claire Brown MD.

University of California San Diego, La Jolla, CA. Daniel A. Sweeney, M.D., Constance A. Benson, M.D., Farhana Ali, M.D., Kimberly McConnell, PharmD, Jennifer Faccio, PharmD Grace Tong-Ventura, PharmD, Karen Chow, Steven Hendrickx, BSN, Dee Dee Pacheco, Kelly Walsh, Cheryl Dullano, Joseph Lencioni

University of California San Francisco, San Francisco CA. Anne F. Luetkemeyer, M.D., Pierre Cedric Crouch, RN, NP, PhD, Sarah B. Doernberg, MD, Yelena Koplowitz, PharmD, Katherine Yang, PharmD, MPH, , Hannah Jang, BS, MSN, PhD, Justin Teraoka

Zuckerberg San Francisco General, University of California, San Francisco. Anne F. Luetkemeyer, M.D., Vivek Jain, MD, MAS, Lisa Winston, MD, Alyssa Michaels, Jay Dwyer, RN, Alexandra Reynolds Moss PharmD, WeyLing Phuag PharmD, Amy Logan, PharmD, Jaime Velasco, Luis Reyes-Umana, Jordan Spatz, PhD, Sara Brickman, RN, Emily Fehman

University of Florida Health-Shands Hospital, Gainesville, FL. Dr. Nicole Iovine, M.D., Lars Beattie, M.D., Rebecca Murray Wakeman, M.D., and Matthew Shaw, M.D.

University of Illinois at Chicago, Chicago, IL. Richard M. Novak MD, Andrea Wendrow, RPh, Susan C. Bleasdale MD, Scott A. Borgetti MD, Alfredo Mena Lora MD, Benjamin Ladner, MD Regina Harden, Marla Schwarber RN, Richard Morrissey.

University of Maryland School of Medicine, Baltimore, MD. Rekha R. Rapaka, MD, PhD, James D. Campbell, MD, MS, Naomi Hauser, MD, Karen L. Kotloff, MD, Carlo Foppiano Palacios, MD, Meagan E. Deming, MD, PhD, Anna E. Carmack, MD, Andrea A. Berry, MD, Justin R. Ortiz, MD, Andrea R. Levine, MD, Cheryl A. Young, BSN, MBA, Lisa L. Chrisley, BSN, Nancy L. Greenberg, RN, Elena DeLeon, RN, Panagiota S. Komninou, Alyson N.B. Kwon, MS, Brenda Dorsey, MS, BSN, CCRP, Myounghee Lee, PharmD, PhD, Andrew P. Chi, PharmD, Jennifer A. Marron, BSN, MS, Kelly L. Brooks, RN, Patricia A. Farley, RN, BSN, Constance L. Thomas, RN, Lisa M. Turek, RN. This work was also supported by the University of Maryland Institute for Clinical and Translational Research and the University of Maryland General Clinical Research Center.

University of Massachusetts Medical School, Worcester, MA. Robert W. Finberg, M.D., Jennifer P. Wang, MD, Mireya Wessollosky, M.D. M.P.H., Juan Perez-Velazquez, MD, Karen Longtine, BS, RN, CCRC, Jaclyn Longtine, BA, CCRC, Carol Ciccarelli, AD, RN, Maureen Campion PharmD, Nitasha Sanil, PharmD, RPh, Craig Dooley, PharmD, RPh.

University of Miami, Miami, FL. Jose Guillermo Castro, M.D.

University of Minnesota, Minneapolis, MN. Susan Kline, M.D., M.P.H., Joanne Billings, M.D., M.P.H., Brooke Noren, R.N., Hyun Kim, M.D., Tyler D. Bold, M.D., PhD. Sameh Hoyazen, M.D., Zachary Kaltenborn, M.D., Mary Baily, RRT, Dale Carlquist, Mandi DeGrote, Tommy Goodwin, Jamie Heisdorffer, R.N., Dean Krueger, Coley Landvik, R.N., Mia Larson, R.N., Michelle Pitt, Jasmine Tatah, Kyong Yun, Joshua Thiede, Ph.D., Christine Ronayne, Allison Weyer, Alex Pobereskin, Annie McFarland, Peter Southern, PhD, Theresa Christiansen, RPh, Derek LaBar, PharmD, Darlette Luke, RPh.

University of Nebraska Medical Center, Omaha, NE. Andre C Kalil, M.D., M.P.H., Angela L Hewlett, M.D., Philip W Smith, M.D., Mark G. Kortepeter, M.D., LuAnn Larson, R.N., BSN, Brooklin Zimmerman, R.N., MSN, Katelyn Hilz, R.N., Karmen Delancey, R.N., Sheryl Houston, R.N., BSN, Jonathan Beck, Pharm.D., Erin Iselin, Pharm.D., Jade Lindsey, CPhT, Diana F. Florescu, M.D., Daniel W Johnson, M.D., David Brett-Major, M.D., Kelly Cawcutt, M.D., James Lawler, M.D., John Lowe, Ph.D., Cristopher Kratochvil, M.D., Jana Broadhurst, M.D., Paul Fey, Ph.D., Elizabeth Schnaubelt, M.D., James Sullivan, M.D., Steven Lisco, M.D., Brian Boer, M.D., Kristina Bailey, M.D., Candace Huebert, M.D., Craig Piquette, M.D., Heather Strah, M.D., John Dickinson, M.D., Dustin Krutsinger, M.D., Tammy Whichman, M.D., Meilinh Thi, D.O.

University of New Mexico Health Sciences Center, Albuquerque, NM. Michelle Harkins, MD, Gregory Mertz MD, Nestor Sosa MD, A. Doran Bostwick, MD, Timothy Noonan MD, Margaret Nicole Trujillo, Prince Thomas, Susan Kunkle, PharmD, Donna Sedillo, Rebecca Brito, Hengameh Raissy PharmD.

University of Pennsylvania, Philadelphia, PA. William Short, M.D. M.P.H, Pablo Tebas, M.D., Jillian T. Baron, M.D., MPH, Peter Liu, M.D., Rosemarie Kappes, MPH, Eileen B. Donaghy, MSN, ANP-BC, Emily Buss, B.S., Emily Stumm, B.S., Alexander Shulman, B.A., Roni Devassy, B.S., Lizette Grajales, B.S., Kevyn Mines, James Deloatch, Alan Wanicur, Zuleika Guzman.

University of Rochester Medical Center, Rochester, NY. Ann R. Falsey, MD Angela R. Branche, MD , Cheryl Rozario, MD Doreen Francis, RN, Sally Thomas, LPN, Sharon Moorehead HPC, Deirdre Won-Short, RN, Cynthia MacDonald, RN, Sarah Northup MPH, Steve Bean PharmD, Kyle Richards, PharmD, Carol Cole PharmD.

University of Texas Health, San Antonio, University Health System, and the South Texas Veterans Health Care System, San Antonio, TX. Thomas F. Patterson, M.D., Philip O. Ponce, M.D., Barbara S. Taylor, M.D., Jan E. Patterson , M.D., Jason E. Bowling, M.D., Heta Javeri, M.D., Robin Tragus, M.S.N., R.N., Gabriel Catano, Irma Scholler, M.S..N, R.N., Janet Garza, R.N., Rose Ann Barajas, Jonathan Polanco, Armando Garcia, Pharm.D, Bridgette Soileau, Patricia Heard, Maria Irma Castro, Robert Villarreal, Mark DeRosa, CRT, Trung Vu, M.D., Michael Kevin Dixon, D.O., Mary Katherine Theoktisto, M.D., Kaylin Sallee, PA-C, Alejandro Cabo, M.D., Danielle O. Dixon, D.O., Abdelhameed Nawwar, M.D., Manuel Camilo Endo Carvajal, M.D.

University of Texas Medical Branch, Galveston, TX. Susan L. F. McLellan, MD, MPH, Lucas S. Blanton, MD, Richard Rupp, MD, Justin B. Seashore MD, David Reynoso MD ,PhD, Robert Cox, RN, Doreen Jones, RN, BSN, MS, Masoomeh Ehsani, Pharm D., RPh.Diane Barrett, MS, CCRP,

Kristin Pollock, RN, CCRP, Lisa Garcia, RPT, Cori Burkett, PA-C, Gerianne Casey, RN, Angela Smith, RN, Corri Levine

UT Southwestern, Dallas, TX. Mamta K. Jain, M.D., Satish Mocherla, MD, Jessica Meisner, MD, Amneris Luque, MD, Helen King, MD, Reuben Arasratnam, MD, R. Giselle Huett, MS, CCRP, Erika Molina, BS, Alexis Avery, MS, Natalie Dellavalle, PharmD, BCPS, Azadeh Mozaffari, PharmD, RRh, Reshma Wright, RPh.

University of Utah, Salt Lake City, UT. Carlos A. Gomez, M.D., Hannah N. Imlay, MD, Emily S. Spivak, MD, Laura Certain, MD, Jakrapun Pupaibool, MD, Robert Odrobina, MD, Sankar Swaminathan, MD, Theresa A. Sofarelli, PA-C, Michael Voight PharmD, Inge Stijleman MS, CCRC, Sally Bradstreet, B.S.; Mary Jane Tinnes, CCRC.

University of Virginia, Charlottesville, VA. Patrick E. H. Jackson, M.D.; Taison D. Bell, M.D.; Rebecca Dillingham, M.D., M.P.H.; Christopher C. Moore, M.D., Miranda J. West, M.S.; Heather M. Haughey, Ph.D.; Ashley Simpson, M.S.; Sonya Gunter, M.S.; Mary Marshall, RN; Karen Ahern, RN

VA Palo Alto Health Care System, Palo Alto, CA. Mark Holodniy, MD, Aarthi Chary, MD, Theresa Peters, BSN, MS, RN, Jessica Lopez, BS.

Vanderbilt University Medical Center, Nashville, TN. C. Buddy Creech, MD, MPH.; Isaac P. Thomsen, MD, MSCI; Todd W. Rice, MD, MSCI; Shanda Phillips, RN, BSN; Naomi P. Kown, APN, ACNP-BC; Katherine Sokolow, RN, MSN; Deborah Myers, CCRP; Robert Adkisson, RN; Braxton Hern, BS; Shannon Walker, MD; Natalia Jimenez, PhD, MSCI; Cindy Trimmer, BS; Shelly McGehee, BS; Roberta Winfrey; Sandra Yoder, MT; Eric Brady, BS; Nicole Soper, MT; Monique Bennett, PhD; John Oleis, DPh; Donna Torr, PharmD

Walter Reed National Military Medical Center, Bethesda, MD. Nikhil Huprikar, M.D.; Anuradha Ganesan, M.B.B.S., M.P.H.; Irma Barahona, B.S.N, R.N.; Jess D. Edison, M.D.; Whitney Howell MPH.; Sherri Loy; Jessica Wong-Flores, PharmD; Erika Walker, M.D.; Rose Ressler, D.O.; Michael Kavanaugh, M.D.; Dana Blyth, M.D.; Wesley Campbell, M.D.; Jason Blaylock, M.D.; Jason Regules M.D.; Catherine Decker, M.D.; Todd Gleeson, M.D.; David Stagliano, M.D., Jennifer Kicker, M.D.

Womack Army Medical Center, Ft. Bragg, NC. David C. Hostler, M.D., M.P.H.; Jordanna M. Hostler, MD; Brian T. Shahan, M.D.

### **The additional groups participated in the ACTT-2 Trial**

Infectious Diseases Clinical Research Consortium, Emory University, Atlanta, GA. David S. Stephens MD, Sidnee Young, Dianne Watson

National Emerging Special Pathogens Training and Education Center (NETEC). Mark G Kortepeter, MD MPH, Sami Vasistha, MS.

INSIGHT Copenhagen ICC: Daniel Murray, Ph.D., Lars Peters, M.D., Bitten Aagaard, B.Sc.N., Charlotte Bjernved, M.S., Jakob Friis Larsen, M.A., Dorthe Raben, M.Sc.,



INSIGHT London ICC (MRC CTU at UCL, London, UK). Fleur Hudson, Katherine Beaney, Nicola Harris, Colette Pryor, Helen Webb, Yolanda Collaco Moraes, Helen Ainscough, Silvia Forcat, Sarah Pett, Abdel Babiker

INSIGHT University of Minnesota Coordinating Center. Eileen Denning, Nicole Engen, James D. Neaton

Infectious Disease Clinical Research Program (IDCRP), Uniformed Services University of the Health Sciences, Bethesda, MD. Timothy H. Burgess, M.D., M.P.H; Brian Agan, M.D.; Julia Rozman, B.S., Christina Fox; CCRP, CCRC; Sandra Waggoner, B.A.

Uniformed Services University of the Health Sciences, Bethesda, MD. Kevin K. Chung, M.D.

US Centers for Disease Control and Prevention Atlanta, GA. Timothy M Uyeki, M.D. M.P.H

Biomedical Advanced Research and Development Authority, Washington, DC. Robert Walker, M.D., G. Lynn Marks, M.D.

Gilead Sciences, Foster City, CA. Anu Osinusi, M.D., Huyen Cao, M.D., Diana Brainard, M.D.

Eli Lilly, Indianapolis, IN. Stephanie de Bono, M.D., Anabela Cardoso, M.D., M.B.A, Douglas Schlichting, M.D.

The Emmes Company, LLC, Rockville, MD. Jennifer L. Ferreira, ScM; Michelle Green, MPH, MBA; Mat Makowski, PhD; Michael R. Wierzbicki, PhD; Tom M. Conrad, PhD; Jill Ann El-Khorazaty, MS; Heather Hill M.S.; Ashley Bowersox, MPH; Aya Nakamura, MS, RN, RAC, CCRA; David Santos M.P.H; David Styers; Gina Simone; Holly Baughman; Jackie Woodward, MEd; Katie Menard; Marian Ewell Sc.D.; Nicole Matthews; Stephanie Pettibone; and the entire Emmes SDCC Team.

Clinical Monitoring Research Program Directorate, Frederick National Laboratory for Cancer Research, Frederick, MD. Beth Baseler M.S., Tyler Bonnett M.S., Alissa Burkey M.S., Theresa Engel M.F.S., Scott Garrand M.S., Nikki Gettinger M.P.H, Lisa Giebeig M.S., Mi Ha Kim, Ph.D., Teri Lewis B.S., Madelaine Ouellette B.S., Shelly Simpson M.S., Jing Wang, M.S.

FHI Clinical. Danielle Fisher, MHS, Wendi McDonald, BSN and the FHIC team

Technical Resources International (TRI), Inc, Rockville, MD.

Melynda Holmes, M.S., Perry Gonella, M.S., M.B.A., Neta Nelson, M.P.H., Jessica Ellis, Ph.D., Dorie Olson, PMP, DMID CROMS Essential Regulatory Documents Group Team (ERDG Team), DMID CROMS Study Information Office Team (SIO Team), DMID CROMS Safety Oversight Committee Support Team (SOCS Team), DMID CROMS Teleconferencing Team, DMID CROMS Safety and Pharmacovigilance Team (PVG Team), DMID CROMS Clinical Quality Management and Quality Assurance (CQM/QA Team), DMID CROMS Information Technology (IT Team), DMID CROMS Training Team

ICON:. Mary Alas, Tamara Block, Beth Breazeale, CCRC, John Groves, Wes Haley, Josh Jones, Nicole Radcliff, Susan Rowlyk. Erin Zulbeari, Site Monitoring Team

National Institute of Allergy and Infectious Diseases, National Institutes of Health, Bethesda, MD. John H. Beigel, M.D., Kay M. Tomashek, M.D., M.P.H., Seema Nayak, M.D., Walla Dempsey, Ph.D., Effie Nomicos R.N., M.S.N., Rhonda Pikaart-Tautges, B.S., Mohamed Elsafy

M.D., Varduhi Ghazaryan, M.D., Lori Newman, M.D., Robert Jura, R.N., B.S.N., Hyung Koo, R.N., BSN, Janice Arega, M.S., Claudia Baxter, RN, BSN, Ruth Florese, MPH, PhD, Binh Hoang, RPh, PharmD, MBA Marina Lee Ph.D., Elisa Sindall, R.N., B.S.N, Olivia Sparer, Tammy Yokum, M.S.N., R.N., Guinevere Chun, R.N., Crystal Harrington, R.N, B.S.N, Tatiana Beresnev, M.D., Jorge Mejia-Galvis, M.D., Audria Crowder, Patricia Gottdiener, B.S.N., M.S., Dean Follmann, Ph.D., Lori E. Dodd, Ph.D., Michael Proschan, Ph.D., Mary Smolskis, R.N., M.A., Page Crew Pharm.D., MPH, Jeanne Billioux, M.D., Susan Vogel, R.N., B.S.N, Gregory A. Deye, M.D., Hiromi Imamichi, Ph.D., Lisa Hensley, Ph.D., Dan Curtin, H. Clifford Lane, M.D., and Emily Erbeling, M.D.

### **Supplemental Methods:**

#### **Additional Study Design Details**

The trial was designed, overseen and sponsored by the NIAID's Division of Microbiology and Infectious Diseases (DMID) with input from selected site investigators. Sites entered the data into Advantage eClinical<sup>SM</sup>, designed by The Emmes Company LLC. The sponsor and staff from Emmes, which is funded by the sponsor, analyzed the data. The manuscript was revised and approved by all the authors, who agreed to submit the manuscript for publication.

#### **Additional Study population Details**

After informed consent was obtained, participants 18 years of age or older who were hospitalized with symptoms suggestive of COVID-19 were assessed for eligibility. Participants had to meet one of the following criteria suggestive of lower respiratory tract infection at the time of enrollment: radiographic infiltrates by imaging study, peripheral oxygen saturation (SpO<sub>2</sub>)  $\leq 94\%$  on room air, or requiring supplemental oxygen, mechanical ventilation, or extracorporeal membrane oxygenation (ECMO). There was no limit to the duration of symptoms prior to enrollment. Participants had to have a laboratory-confirmed SARS-CoV-2 infection as determined by a positive reverse transcription, polymerase-chain-reaction (RT-PCR) assay result from any respiratory specimen collected  $< 72$  hours prior to randomization. During the study, this criterion was modified due to limitations in testing capacity to also allow a RT-PCR positive specimen that was collected  $\geq 72$  hours prior to randomization if the site was unable to obtain a repeat sample and if the participant had progressive disease consistent with ongoing SARS-CoV-2 infection. Other inclusion criteria included agreeing not to participate in another COVID-19 treatment clinical trial through Day 29 and practicing heterosexual abstinence or using study-specified contraception through Day 29 for women of childbearing potential. Exclusion criteria included having either an alanine aminotransferase (ALT) or an aspartate aminotransferase (AST)  $> 5$  times the upper limit of the normal range; impaired renal function as determined by calculating an estimated glomerular filtration rate (eGFR), or need for hemodialysis or hemofiltration; allergy to study product; pregnancy or breast-feeding; and anticipated discharge from the hospital or transfer to another hospital within 72 hours of enrollment.

Randomization was stratified by study site and disease severity at enrollment and was performed using a web-based Internet Data Entry System, Advantage eClinical<sup>SM</sup>. Severe disease was defined as participants in ordinal category 7 and 6, and included those on ECMO, invasive or non-invasive mechanical ventilation, or high flow oxygen devices. Mild / moderate disease was defined as ordinal category 5 and 4, and included those on low flow oxygen devices (defined as 15L/min or less) and those not on supplemental oxygen.

### **Additional Study Procedures Details**

Participants were assessed daily from Day 1 through Day 29 while hospitalized. Participants discharged from the hospital had study visits at Days 15 and 29. In-person visits were preferred, although restrictions due to local infection control measures often limited participants from leaving their home and returning to the study sites. Follow-up by phone was acceptable in these circumstances. An additional study visit on Day 22 was conducted by phone. The participant's clinical status was captured daily while hospitalized using an 8-category ordinal scale (defined in the main manuscript) and the National Early Warning Score (NEWS) (1, 2). Participants discharged prior to Day 15 had the ordinal scale assessed at all follow-up visits while the NEWS required in-person visits. Blood samples for safety laboratory tests (white blood cell count with differential, hemoglobin, platelet count, creatinine, glucose, total bilirubin, ALT, AST, and prothrombin time), and oropharyngeal (OP) swab samples (nasopharyngeal [(NP)] could be substituted) were collected on Days 1 (before initial infusion), 3, 5, 8, and 11 while hospitalized, and Days 15 and 29 for participants able to attend an in-person visit or who were still hospitalized.

All serious adverse events (SAE), and grade 3-4 adverse events (AE) that represented an increase in severity from Day 1, and any grade 2 or higher suspected drug-related hypersensitivity reactions associated with study product administration were captured in this trial. AEs were assessed by review of the electronic medical record, physical examinations, vital signs, and laboratory studies from the time the informed consent form was signed through Day 29. AEs were classified in accordance with the Medical Dictionary for Regulatory Activities® (MedDRA version 23.0), and their relationship to study product, severity, and outcome were documented.

### **Additional Statistical Analysis Details**

The primary analysis was a log-rank test of time-to-recovery between remdesivir plus baricitinib and remdesivir plus placebo stratified by disease severity as defined above. The relevant treatment efficacy parameter is the “recovery rate ratio” (for the combination arm relative to control), which is akin to the hazard ratio in survival analysis but for the beneficial outcome of recovery. Two practical considerations result from considering time to a beneficial outcome. First, a recovery rate ratio greater than one indicates an improvement for the combination arm. Second, failure to recover and death are both censored at Day 29. Consequently, participants censored on the last observation day reflect two different states: death and failure to recover by Day 29. Hence, a breakdown of deaths by treatment arm is also important to understanding treatment efficacy. The key secondary analysis tested a difference in the ordinal score distribution between remdesivir plus baricitinib and remdesivir plus placebo at Day 15 using the “common odds ratio” from a proportional odds model, stratifying by baseline disease severity stratum.

The study was designed to achieve 85% power for detecting a recovery rate ratio of 1.35 with a two-sided type-I error rate of 5%. Enrollment continued through April 19, 2020 to ensure at least 400 recoveries and to address subgroup analysis. Because the SAP did not include a provision for correcting for multiplicity when conducting tests for secondary outcomes, results are reported as point estimates and 95% confidence intervals. The widths of the confidence intervals have not been adjusted for multiplicity, so the intervals should not be used to infer definitive treatment effects for secondary outcomes. More details can be found in the statistical analysis plan. Analyses were conducted using SAS version 9.4 and R version 3.5.1.

### **Additional Sensitivity Analysis Related to Baseline Ordinal Score Category 6**

Due to the potential variation in the definition of high-flow oxygen, a sensitivity analysis was performed combining ordinal score categories 5 and 6. The recovery rate ratio using this stratification (4, 5+6, 7) was 1.18 (95% CI: 1.03-1.35; p=0.018).

### **Interim Analysis Details**

At the first interim analysis, there were 286 recoveries, and the total number of recoveries anticipated by trial’s end was 723. Therefore, the information fraction was  $286/723=0.3956$ .

The free WinLD program from the University of Wisconsin shows that the boundary at the first look is 3.378.

At the second and final interim analysis, the number of recoveries was 817. That is, we over-ran the targeted number of recoveries. That means that the real information fraction at the first interim analysis was not  $286/723=0.3956$ , but  $286/817=0.350$ . Nonetheless, the boundary that was used was 3.378. Therefore, we must find the boundary  $c$  such that  $P\{|Z(t_1)| > 3.378 \text{ or } |Z(t_2)| > c\} = 0.05$ . It is clear that we should use  $t_2 = 1$ , but what do we use for  $t_1$ , the information fraction we thought at the first analysis, or the actual information fraction at the first analysis? Note that the null joint distribution of the z-scores at the first and second looks is bivariate normal with means (0,0), variances (1,1), and correlation  $\sqrt{\frac{t_1}{t_2}}$ . The joint distribution depends only on the **ratio** of information fractions, so only the actual numbers of recoveries matters. In other words,  $t_1$  and  $t_2$  should be the true information fractions at the two looks, (0.350,1). This causes a problem if we use the Compute Bounds option of the WinLD program because if we give it the true information fractions 0.350 and 1, it will give us a different boundary at  $t_1$  than what we actually used. Therefore, use the Compute Probability option instead of Compute Bounds. We give it the true information fractions, 0.350 and 1, and we input the boundary we actually used, 3.378, at the first look. Through trial and error, we try different values for the boundary  $c$  at the second look until we find one such that the cumulative exit probability (the last column in the table WinLD provides) by the second look is 0.05. After a few tries, I found that a boundary of 1.963 at the second look gives a cumulative exit probability just slightly under 0.05 (actual cumulative type 1 error rate is 0.04994). See below for the WinLD output.

**Lan-DeMets Group Sequential Boundaries Calculations**

Compute Probability  
 Analysis Parameters  
 Interim Analyses (k): 2  
 Information times(t): User Input  
 Test Boundaries: Two-Sided Symmetric  
 Probability Parameters  
 Determine Bounds: User Input  
 Drift: 0.0

| Time | Lower | Upper | Nominal Upr<br>Alpha | Cum exit<br>pr |
|------|-------|-------|----------------------|----------------|
|------|-------|-------|----------------------|----------------|

|      |         |        |         |         |
|------|---------|--------|---------|---------|
| 0.35 | -3.3780 | 3.3780 | 0.00037 | 0.00073 |
| 1.00 | -1.9630 | 1.9630 | 0.02482 | 0.04994 |

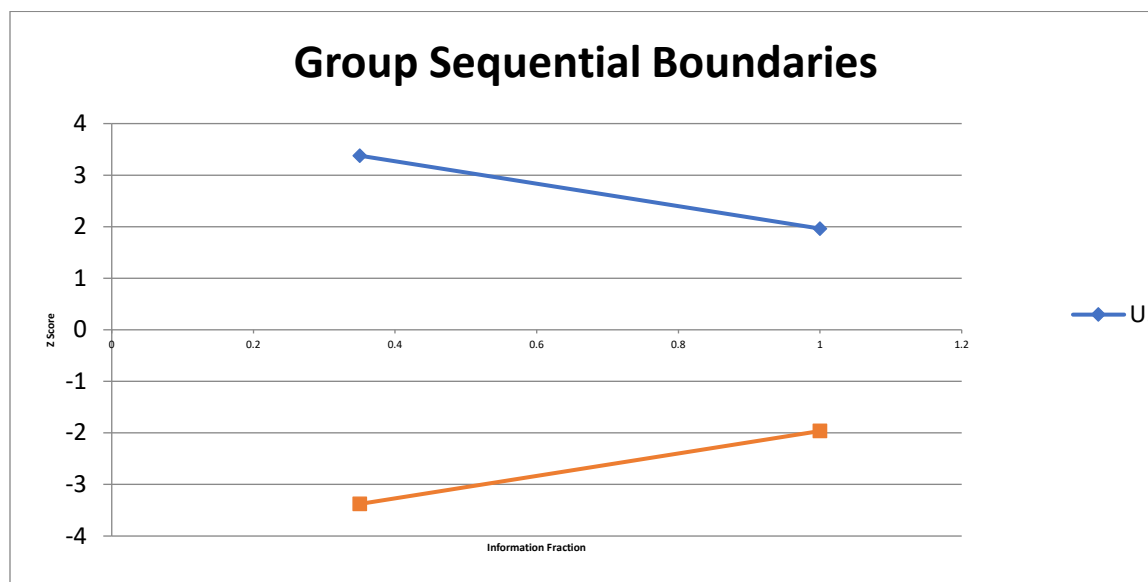

The first stopping boundary was not crossed during the first interim, so the study continued until a final look at 817 recoveries. The analysis gave a recovery-rate ratio of 1.17 (95% CI: 1.02, 1.34;  $p=0.02$ ) [Table S13], which crossed the stopping boundary. Upon final database lock, with full follow-up of all individuals there were an additional 22 recoveries, for a total of 839 recoveries (RRR: 1.16, 95% CI 1.01, 1.32;  $p=0.04$ ). The main manuscript reports on the latter results that correspond to the full cohort.

### Registration at ClinicalTrials.gov

Enrollment began on May 8, 2020, and the study record was submitted on May 22, 2020. 179 subjects were enrolled prior to submission of the trial information to clinicaltrials.gov. The sponsor uses automated systems for protocol registration and the systems are linked to the protocol number. As ACTT-2 is a platform trial with the same protocol number as ACTT-1, ACTT-2 would have overwritten ACTT-1 registration. The sponsor had to reconfigure the systems to be able to generate a different registration number for ACTT-2 than ACTT-1. This is within the US regulations for clinicaltrial.gov registration ([https://clinicaltrials.gov/ct2/manage-recs/faq#fr\\_5](https://clinicaltrials.gov/ct2/manage-recs/faq#fr_5)) but does not conform to the recommendations by ICMJE for trial registration. (<http://www.icmje.org/recommendations/browse/publishing-and-editorial-issues/clinical-trial-registration.html>).

**Supplemental Tables and Figures:**

**Table S1. Ordinal Scale**

|                            |          |                                                                                                  |
|----------------------------|----------|--------------------------------------------------------------------------------------------------|
| <b>Recovered</b>           | <b>1</b> | <b>Not hospitalized, no limitations on activities</b>                                            |
|                            | <b>2</b> | <b>Not hospitalized, limitation on activities and/or requiring home oxygen</b>                   |
|                            | <b>3</b> | <b>Hospitalized, not requiring supplemental oxygen – no longer requires ongoing medical care</b> |
| <b>Population Enrolled</b> | <b>4</b> | <b>Hospitalized, not requiring supplemental oxygen – requiring ongoing medical care</b>          |
|                            | <b>5</b> | <b>Hospitalized, requiring supplemental oxygen</b>                                               |
|                            | <b>6</b> | <b>Hospitalized, on non-invasive ventilation or high flow oxygen devices</b>                     |
|                            | <b>7</b> | <b>Hospitalized, on mechanical ventilation or ECMO</b>                                           |
|                            | <b>8</b> | <b>Death</b>                                                                                     |



**Table S2. Categorical Demographic and Baseline Characteristics by Treatment Group**

|                                 |                                              | <b>Baricitinib +<br/>RDV Subjects<br/>(N=515)</b> |          | <b>Placebo +<br/>RDV<br/>Subjects<br/>(N=518)</b> |          | <b>All Subjects<br/>(N=1033)</b> |          |
|---------------------------------|----------------------------------------------|---------------------------------------------------|----------|---------------------------------------------------|----------|----------------------------------|----------|
| <b>Demographic<br/>Category</b> | <b>Characteristic</b>                        | <b>n</b>                                          | <b>%</b> | <b>n</b>                                          | <b>%</b> | <b>n</b>                         | <b>%</b> |
| Sex                             | Male                                         | 319                                               | 62       | 333                                               | 64       | 652                              | 63       |
|                                 | Female                                       | 196                                               | 38       | 185                                               | 36       | 381                              | 37       |
| Ethnicity                       | Not Hispanic or Latino                       | 246                                               | 48       | 240                                               | 46       | 486                              | 47       |
|                                 | Hispanic or Latino                           | 263                                               | 51       | 268                                               | 52       | 531                              | 51       |
|                                 | Not Reported                                 | 2                                                 | <1       | 2                                                 | <1       | 4                                | <1       |
|                                 | Unknown                                      | 4                                                 | 1        | 8                                                 | 2        | 12                               | 1        |
| Race                            | American Indian or<br>Alaska Native          | 2                                                 | <1       | 8                                                 | 2        | 10                               | 1        |
|                                 | Asian                                        | 49                                                | 10       | 52                                                | 10       | 101                              | 10       |
|                                 | Native Hawaiian or<br>Other Pacific Islander | 4                                                 | 1        | 7                                                 | 1        | 11                               | 1        |
|                                 | Black or African<br>American                 | 77                                                | 15       | 79                                                | 15       | 156                              | 15       |
|                                 | White                                        | 251                                               | 49       | 245                                               | 47       | 496                              | 48       |
|                                 | Unknown                                      | 132                                               | 26       | 127                                               | 25       | 259                              | 25       |
| Geographic Region 1             | US Site                                      | 441                                               | 86       | 444                                               | 86       | 885                              | 86       |
|                                 | Non-US Site                                  | 74                                                | 14       | 74                                                | 14       | 148                              | 14       |
| Geographic Region 2             | North America                                | 476                                               | 92       | 477                                               | 92       | 953                              | 92       |
|                                 | Europe                                       | 6                                                 | 1        | 7                                                 | 1        | 13                               | 1        |
|                                 | Asia                                         | 33                                                | 6        | 34                                                | 7        | 67                               | 6        |
| Age (years)                     | <40                                          | 87                                                | 17       | 86                                                | 17       | 173                              | 17       |
|                                 | 40-64                                        | 281                                               | 55       | 274                                               | 53       | 555                              | 54       |
|                                 | >=65                                         | 147                                               | 29       | 158                                               | 31       | 305                              | 30       |

|                                                       |                                                                                 | <b>Baricitinib +<br/>RDV Subjects<br/>(N=515)</b> |          | <b>Placebo +<br/>RDV<br/>Subjects<br/>(N=518)</b> |          | <b>All Subjects<br/>(N=1033)</b> |          |
|-------------------------------------------------------|---------------------------------------------------------------------------------|---------------------------------------------------|----------|---------------------------------------------------|----------|----------------------------------|----------|
| <b>Demographic<br/>Category</b>                       | <b>Characteristic</b>                                                           | <b>n</b>                                          | <b>%</b> | <b>n</b>                                          | <b>%</b> | <b>n</b>                         | <b>%</b> |
| Baseline Clinical Status                              | Hospitalized, not requiring supplemental oxygen, requiring ongoing medical care | 70                                                | 14       | 72                                                | 14       | 142                              | 14       |
|                                                       | Hospitalized, requiring supplemental oxygen                                     | 288                                               | 56       | 276                                               | 53       | 564                              | 55       |
|                                                       | Hospitalized, on non-invasive ventilation or high flow oxygen devices           | 103                                               | 20       | 113                                               | 22       | 216                              | 21       |
|                                                       | Hospitalized, on invasive mechanical ventilation or ECMO                        | 54                                                | 10       | 57                                                | 11       | 111                              | 11       |
| Duration of Symptoms prior to enrollment <sup>a</sup> | First Quartile (<= 5 Days)                                                      | 134                                               | 26       | 130                                               | 25       | 264                              | 26       |
|                                                       | Second Quartile (6 to <= 8 Days)                                                | 159                                               | 31       | 161                                               | 31       | 320                              | 31       |
|                                                       | Third Quartile (9 to <= 10 Days)                                                | 96                                                | 19       | 84                                                | 16       | 180                              | 17       |
|                                                       | Fourth Quartile (11+ Days)                                                      | 120                                               | 23       | 133                                               | 26       | 253                              | 24       |
| Duration of Symptoms prior to enrollment <sup>a</sup> | <= 10 Days                                                                      | 389                                               | 76       | 375                                               | 72       | 764                              | 74       |
|                                                       | > 10 Days                                                                       | 120                                               | 23       | 133                                               | 26       | 253                              | 24       |
| Duration of Symptoms prior to enrollment <sup>a</sup> | <= Median (8 Days)                                                              | 293                                               | 57       | 291                                               | 56       | 584                              | 57       |
|                                                       | > Median (8 Days)                                                               | 216                                               | 42       | 217                                               | 42       | 433                              | 42       |
| Comorbidities at baseline <sup>b</sup>                | Asthma                                                                          | 53                                                | 10       | 44                                                | 9        | 97                               | 10       |
|                                                       | Cancer                                                                          | 20                                                | 4        | 17                                                | 3        | 37                               | 4        |

|                                         |                                                                                            | <b>Baricitinib +<br/>RDV Subjects<br/>(N=515)</b> |          | <b>Placebo +<br/>RDV<br/>Subjects s<br/>(N=518)</b> |          | <b>All Subjects<br/>(N=1033)</b> |          |
|-----------------------------------------|--------------------------------------------------------------------------------------------|---------------------------------------------------|----------|-----------------------------------------------------|----------|----------------------------------|----------|
| <b>Demographic<br/>Category</b>         | <b>Characteristic</b>                                                                      | <b>n</b>                                          | <b>%</b> | <b>n</b>                                            | <b>%</b> | <b>n</b>                         | <b>%</b> |
|                                         | Cardiac Valvular Disease                                                                   | 10                                                | 2        | 12                                                  | 2        | 22                               | 2        |
|                                         | Chronic Kidney Disease                                                                     | 31                                                | 6        | 33                                                  | 7        | 64                               | 6        |
|                                         | Chronic Liver Disease                                                                      | 13                                                | 3        | 15                                                  | 3        | 28                               | 3        |
|                                         | Chronic Oxygen Requirement                                                                 | 8                                                 | 2        | 9                                                   | 2        | 17                               | 2        |
|                                         | Chronic Respiratory Disease                                                                | 39                                                | 8        | 30                                                  | 6        | 69                               | 7        |
|                                         | Coagulopathy                                                                               | 3                                                 | 1        | 4                                                   | 1        | 7                                | 1        |
|                                         | Congestive Heart Failure                                                                   | 31                                                | 6        | 31                                                  | 6        | 62                               | 6        |
|                                         | Coronary Artery Disease                                                                    | 50                                                | 10       | 51                                                  | 10       | 101                              | 10       |
|                                         | Diabetes I                                                                                 | 5                                                 | 1        | 5                                                   | 1        | 10                               | 1        |
|                                         | Diabetes II                                                                                | 195                                               | 39       | 175                                                 | 35       | 370                              | 37       |
|                                         | Hypertension                                                                               | 258                                               | 51       | 264                                                 | 52       | 522                              | 52       |
|                                         | Immune Deficiency                                                                          | 17                                                | 3        | 13                                                  | 3        | 30                               | 3        |
|                                         | Obesity                                                                                    | 295                                               | 58       | 272                                                 | 53       | 567                              | 56       |
|                                         | Any History of DVT or PE                                                                   | 11                                                | 2        | 11                                                  | 2        | 22                               | 2        |
| Risk Factors for DVT or PE <sup>b</sup> | Current nicotine consumption                                                               | 18                                                | 4        | 29                                                  | 6        | 47                               | 5        |
|                                         | Major Surgery, Significant Trauma, or Long Hospitalization in one month prior to screening | 14                                                | 3        | 2                                                   | <1       | 16                               | 2        |
|                                         | Prolonged Immobility in one month prior to screening                                       | 11                                                | 2        | 13                                                  | 3        | 24                               | 2        |

|                                    |                                                                     | <b>Baricitinib +<br/>RDV Subjects<br/>(N=515)</b> |          | <b>Placebo +<br/>RDV<br/>Subjects<br/>(N=518)</b> |          | <b>All Subjects<br/>(N=1033)</b> |          |
|------------------------------------|---------------------------------------------------------------------|---------------------------------------------------|----------|---------------------------------------------------|----------|----------------------------------|----------|
| <b>Demographic<br/>Category</b>    | <b>Characteristic</b>                                               | <b>n</b>                                          | <b>%</b> | <b>n</b>                                          | <b>%</b> | <b>n</b>                         | <b>%</b> |
|                                    | Any risk factor for DVT or PE (excluding COVID-19) not listed above | 11                                                | 2        | 18                                                | 4        | 29                               | 3        |
| Comorbidities Group 1 <sup>c</sup> | Any Comorbidities                                                   | 443                                               | 86       | 417                                               | 81       | 860                              | 83       |
|                                    | No Comorbidities                                                    | 64                                                | 12       | 91                                                | 18       | 155                              | 15       |
|                                    | Unknown                                                             | 8                                                 | 2        | 10                                                | 2        | 18                               | 2        |
| Comorbidities Group 2 <sup>c</sup> | No Comorbidities                                                    | 64                                                | 12       | 91                                                | 18       | 155                              | 15       |
|                                    | 1 Comorbidity                                                       | 148                                               | 29       | 122                                               | 24       | 270                              | 26       |
|                                    | 2 or more Comorbidities                                             | 284                                               | 55       | 285                                               | 55       | 569                              | 55       |
|                                    | Unknown                                                             | 19                                                | 4        | 20                                                | 4        | 39                               | 4        |
| Comorbidities Group 3              | Obese                                                               | 295                                               | 57       | 272                                               | 53       | 567                              | 55       |
|                                    | Non-Obese                                                           | 211                                               | 41       | 238                                               | 46       | 449                              | 43       |
|                                    | Unknown                                                             | 9                                                 | 2        | 8                                                 | 2        | 17                               | 2        |

N = Number of subjects enrolled.

<sup>a</sup>Duration of Symptoms prior to enrollment data was missing for 16 subjects.

<sup>b</sup>Percentages are based on the number of subjects with data available for the individual comorbidity and risk factors for DVT or PE.

<sup>c</sup>Current nicotine consumption, Major Surgery, Prolonged Immobility and Any risk factor for DVT or PE are excluded from Comorbidities Group 1 and 2

**Table S3. Continuous Demographic and Baseline Characteristics by Treatment Group**

| <b>Variable</b>          | <b>Statistic</b>   | <b>Baricitinib + RDV (N=515)</b> | <b>Placebo + RDV (N=518)</b> | <b>All Subjects (N=1033)</b> |
|--------------------------|--------------------|----------------------------------|------------------------------|------------------------------|
| Age (years)              | n                  | 515                              | 518                          | 1033                         |
|                          | Mean               | 55.0                             | 55.8                         | 55.4                         |
|                          | Standard Deviation | 15.4                             | 16.0                         | 15.7                         |
|                          | Median             | 55.0                             | 56.0                         | 56.0                         |
|                          | IQR                | 23                               | 24                           | 24                           |
|                          | Minimum            | 18                               | 18                           | 18                           |
|                          | Maximum            | 101                              | 96                           | 101                          |
| Height (cm)              | n                  | 497                              | 494                          | 991                          |
|                          | Mean               | 167.81                           | 168.18                       | 167.99                       |
|                          | Standard Deviation | 10.75                            | 10.97                        | 10.86                        |
|                          | Median             | 167.60                           | 167.60                       | 167.60                       |
|                          | IQR                | 15                               | 15                           | 15                           |
|                          | Minimum            | 134.6                            | 119.4                        | 119.4                        |
|                          | Maximum            | 200.7                            | 198.1                        | 200.7                        |
| Weight (kg)              | n                  | 503                              | 506                          | 1009                         |
|                          | Mean               | 90.78                            | 91.00                        | 90.89                        |
|                          | Standard Deviation | 24.77                            | 25.07                        | 24.91                        |
|                          | Median             | 87.00                            | 86.20                        | 87.00                        |
|                          | IQR                | 31                               | 28                           | 30                           |
|                          | Minimum            | 38.6                             | 33.0                         | 33.0                         |
|                          | Maximum            | 213.6                            | 219.8                        | 219.8                        |
| BMI (kg/m <sup>2</sup> ) | n                  | 496                              | 494                          | 990                          |
|                          | Mean               | 32.16                            | 32.25                        | 32.21                        |

| <b>Variable</b>                                 | <b>Statistic</b>   | <b>Baricitinib + RDV (N=515)</b> | <b>Placebo + RDV (N=518)</b> | <b>All Subjects (N=1033)</b> |
|-------------------------------------------------|--------------------|----------------------------------|------------------------------|------------------------------|
|                                                 | Standard Deviation | 8.17                             | 8.41                         | 8.29                         |
|                                                 | Median             | 30.80                            | 30.55                        | 30.70                        |
|                                                 | IQR                | 9                                | 10                           | 10                           |
|                                                 | Minimum            | 16.9                             | 16.1                         | 16.1                         |
|                                                 | Maximum            | 91.9                             | 66.8                         | 91.9                         |
| Duration of Symptoms prior to Enrollment (days) | n                  | 509                              | 508                          | 1017                         |
|                                                 | Mean               | 8.3                              | 8.6                          | 8.5                          |
|                                                 | Standard Deviation | 4.4                              | 4.6                          | 4.5                          |
|                                                 | Median             | 8.0                              | 8.0                          | 8.0                          |
|                                                 | IQR                | 5                                | 6                            | 5                            |
|                                                 | Minimum            | 0                                | 1                            | 0                            |
|                                                 | Maximum            | 35                               | 32                           | 35                           |
| IQR is the inter-quartile range.                |                    |                                  |                              |                              |

**Table S4.** Summary of Demographic and Clinical Characteristics at Baseline - US Sites

| <b>Characteristic</b>                                           | <b>All Subjects (N=885)</b> | <b>Baricitinib + RDV Subjects (N=441)</b> | <b>Placebo + RDV Subjects (N=444)</b> |
|-----------------------------------------------------------------|-----------------------------|-------------------------------------------|---------------------------------------|
| Age - mean +/- standard deviation, yr                           | 55.9 +/- 15.7               | 55.7 +/- 15.5                             | 56.1 +/- 15.8                         |
| Age Category - no.(%)                                           |                             |                                           |                                       |
| 40-64                                                           | 481 (54.4)                  | 239 (54.2)                                | 242 (54.5)                            |
| <40                                                             | 137 (15.5)                  | 68 (15.4)                                 | 69 (15.5)                             |
| >=65                                                            | 267 (30.2)                  | 134 (30.4)                                | 133 (30.0)                            |
| Sex - no.(%)                                                    |                             |                                           |                                       |
| Female                                                          | 342 (38.6)                  | 177 (40.1)                                | 165 (37.2)                            |
| Male                                                            | 543 (61.4)                  | 264 (59.9)                                | 279 (62.8)                            |
| Race or ethnic group - no.(%)                                   |                             |                                           |                                       |
| American Indian or Alaskan Native                               | 8 (0.9)                     | 1 (0.2)                                   | 7 (1.6)                               |
| Asian                                                           | 32 (3.6)                    | 15 (3.4)                                  | 17 (3.8)                              |
| Black or African American                                       | 156 (17.6)                  | 77 (17.5)                                 | 79 (17.8)                             |
| Native Hawaiian or Other Pacific Islander                       | 11 (1.2)                    | 4 (0.9)                                   | 7 (1.6)                               |
| White                                                           | 487 (55.0)                  | 247 (56.0)                                | 240 (54.1)                            |
| Unknown                                                         | 191 (21.6)                  | 97 (22.0)                                 | 94 (21.2)                             |
| Ethnicity - no.(%)                                              |                             |                                           |                                       |
| Hispanic or Latino                                              | 461 (52.1)                  | 227 (51.5)                                | 234 (52.7)                            |
| Not Hispanic or Latino                                          | 408 (46.1)                  | 208 (47.2)                                | 200 (45.0)                            |
| Not Reported                                                    | 4 (0.5)                     | 2 (0.5)                                   | 2 (0.5)                               |
| Unknown                                                         | 12 (1.4)                    | 4 (0.9)                                   | 8 (1.8)                               |
| BMI - mean +/- standard deviation                               | 32.9 +/- 8.5                | 32.9 +/- 8.4                              | 32.9 +/- 8.6                          |
| Median time (Q1, Q3) from symptom onset to randomization – days | 8 (5,10)                    | 8 (5,10)                                  | 8 (5,11)                              |
| Disease severity - no.(%)                                       |                             |                                           |                                       |
| Moderate Disease                                                | 601 (67.9)                  | 306 (69.4)                                | 295 (66.4)                            |
| Severe Disease                                                  | 284 (32.1)                  | 135 (30.6)                                | 149 (33.6)                            |
| Summary of coexisting conditions - no./total no.(%)             |                             |                                           |                                       |

| <b>Characteristic</b>                                                                                             | <b>All Subjects (N=885)</b> | <b>Baricitinib + RDV Subjects (N=441)</b> | <b>Placebo + RDV Subjects (N=444)</b> |
|-------------------------------------------------------------------------------------------------------------------|-----------------------------|-------------------------------------------|---------------------------------------|
| None                                                                                                              | 103/848 (11.6)              | 39/423 (8.8)                              | 64/425 (14.4)                         |
| One                                                                                                               | 218/848 (24.6)              | 121/423 (27.4)                            | 97/425 (21.8)                         |
| Two or More                                                                                                       | 527/848 (59.5)              | 263/423 (59.6)                            | 264/425 (59.5)                        |
| Coexisting conditions - no./total no.(%)                                                                          |                             |                                           |                                       |
| Asthma                                                                                                            | 92/859 (10.7)               | 50/433 (11.5)                             | 42/426 (9.9)                          |
| Cancer                                                                                                            | 34/862 (3.9)                | 20/434 (4.6)                              | 14/428 (3.3)                          |
| Cardiac Valvular Disease                                                                                          | 20/852 (2.3)                | 9/427 (2.1)                               | 11/425 (2.6)                          |
| Chronic Kidney Disease                                                                                            | 62/860 (7.2)                | 30/432 (6.9)                              | 32/428 (7.5)                          |
| Chronic Liver Disease                                                                                             | 25/859 (2.9)                | 10/432 (2.3)                              | 15/427 (3.5)                          |
| Chronic Oxygen Use                                                                                                | 17/871 (2.0)                | 8/436 (1.8)                               | 9/435 (2.1)                           |
| Chronic Respiratory Disease                                                                                       | 65/863 (7.5)                | 37/434 (8.5)                              | 28/429 (6.5)                          |
| Coagulopathy                                                                                                      | 6/860 (0.7)                 | 2/433 (0.5)                               | 4/427 (0.9)                           |
| Congestive Heart Failure                                                                                          | 61/860 (7.1)                | 31/432 (7.2)                              | 30/428 (7.0)                          |
| Coronary Artery Disease                                                                                           | 97/839 (11.6)               | 48/420 (11.4)                             | 49/419 (11.7)                         |
| Current Nicotine Use                                                                                              | 40/863 (4.6)                | 17/434 (3.9)                              | 23/429 (5.4)                          |
| Diabetes I                                                                                                        | 10/869 (1.2)                | 5/435 (1.1)                               | 5/434 (1.2)                           |
| Diabetes II                                                                                                       | 333/863 (38.6)              | 174/433 (40.2)                            | 159/430 (37.0)                        |
| Hypertension                                                                                                      | 481/859 (56.0)              | 240/427 (56.2)                            | 241/432 (55.8)                        |
| Immune Deficiency (acquired or innate)                                                                            | 30/861 (3.5)                | 17/434 (3.9)                              | 13/427 (3.0)                          |
| Obesity                                                                                                           | 518/869 (59.6)              | 269/432 (62.3)                            | 249/437 (57.0)                        |
| Score on ordinal scale - no.(%)                                                                                   |                             |                                           |                                       |
| 4.Hospitalized, not requiring supplemental oxygen, requiring ongoing medical care (COVID-19 related or otherwise) | 107 (12.1)                  | 51 (11.6)                                 | 56 (12.6)                             |



| <b>Characteristic</b>                                                    | <b>All Subjects<br/>(N=885)</b> | <b>Baricitinib +<br/>RDV Subjects<br/>(N=441)</b> | <b>Placebo +<br/>RDV Subjects<br/>(N=444)</b> |
|--------------------------------------------------------------------------|---------------------------------|---------------------------------------------------|-----------------------------------------------|
| 5. Hospitalized, requiring supplemental oxygen                           | 494 (55.8)                      | 255 (57.8)                                        | 239 (53.8)                                    |
| 6. Hospitalized, on non-invasive ventilation or high flow oxygen devices | 185 (20.9)                      | 89 (20.2)                                         | 96 (21.6)                                     |
| 7. Hospitalized, on invasive mechanical ventilation or ECMO              | 99 (11.2)                       | 46 (10.4)                                         | 53 (11.9)                                     |

**Table S5. Table of missing values for recovery, mortality and ordinal scale at Day 15**

| Recovery status unknown—n (%)                                                                                                                                           |                      |                  |
|-------------------------------------------------------------------------------------------------------------------------------------------------------------------------|----------------------|------------------|
| Visit Day                                                                                                                                                               | Baricitinib<br>N=515 | Placebo<br>N=518 |
| Day 15                                                                                                                                                                  | 17 (3.3%)            | 21 (4.1%)        |
| Day 22                                                                                                                                                                  | 17 (3.3%)            | 22 (4.2%)        |
| Day 29 (+/-3 days)                                                                                                                                                      | 20 (3.9%)            | 26 (5.0%)        |
| Mortality status unknown—n (%)                                                                                                                                          |                      |                  |
| Day 15                                                                                                                                                                  | 37 (7.2%)            | 36 (6.9%)        |
| Day 22                                                                                                                                                                  | 46 (8.9%)            | 52 (10.0%)       |
| Day 29 (+/-3 days)                                                                                                                                                      | 67 (13.0%)*          | 75 (14.5%)*      |
| Day 15 Ordinal score imputations                                                                                                                                        |                      |                  |
| <b>Type 1.</b> In hospital for initial hospitalization and no clinical status score was reported (last observation carried forward to impute ordinal score)             | 0                    | 0                |
| <b>Type 2.</b> Discharged from the hospital and still in study and no clinical status score was reported – values imputed as the worst possible discharge score of “2.” | 20 (3.9%)            | 26 (5.0%)        |
| <b>Type 3.</b> Discontinued from the study (last observation carried forward to impute ordinal score)                                                                   | 35 (6.8%)            | 35 (6.8%)        |

\* Of the subjects that had missing death status, 49 and 52 randomized to Baricitinib and Placebo, respectively, met recovery criteria and therefore had data for the primary analysis. Death after discharge is very uncommon in ACTT-2. Indeed, only one subject in each study arm met the recovery criteria and later died.

**Table S6. Primary analysis using “as randomized” disease severity.**

| Analysis Population    | Treatment Group           | Disease Severity | n   | First Quartile Time to Recovery (Days) |           | Median Time to Recovery (Days) |            | Third Quartile Time to Recovery (Days) |            | HR       |            | P-value |
|------------------------|---------------------------|------------------|-----|----------------------------------------|-----------|--------------------------------|------------|----------------------------------------|------------|----------|------------|---------|
|                        |                           |                  |     | Estimate                               | 95% CI    | Estimate                       | 95% CI     | Estimate                               | 95% CI     | Estimate | 95% CI     |         |
| As randomized and ITT* | Baricitinib + RDV (N=339) | Moderate         | 311 | 4.0                                    | 3.0, 4.0  | 5.0                            | 5.0, 6.0   | 9.0                                    | 8.0, 10.0  | 1.10     | 0.93, 1.29 | -       |
|                        | Placebo + RDV (N=327)     |                  | 292 | 3.0                                    | 3.0, 4.0  | 6.0                            | 5.0, 6.0   | 10.0                                   | 9.0, 11.0  |          |            |         |
|                        | Baricitinib + RDV (N=176) | Severe           | 122 | 7.0                                    | 6.0, 9.0  | 13.0                           | 10.0, 16.0 | NE                                     | 25.0, NE   | 1.29     | 1.00, 1.66 | -       |
|                        | Placebo + RDV (N=191)     |                  | 114 | 9.0                                    | 6.0, 11.0 | 20.0                           | 15.0, 23.0 | NE                                     | NE         |          |            |         |
|                        | Baricitinib + RDV (N=515) | Any Severity     | 433 | 4.0                                    | NE        | 7.0                            | 6.0, 8.0   | 13.0                                   | 12.0, 16.0 | 1.15     | 1.00, 1.31 | 0.047   |
|                        | Placebo + RDV (N=518)     |                  | 406 | 4.0                                    | 4.0, 5.0  | 8.0                            | 7.0, 9.0   | 20.0                                   | 16.0, 23.0 |          |            |         |
|                        | Placebo + RDV (N=509)     |                  | 406 | 4.0                                    | 4.0, 5.0  | 8.0                            | 7.0, 9.0   | 20.0                                   | 16.0, 23.0 |          |            |         |

N = Number of subjects in specified treatment group, disease severity, and analysis population.

n = Number of recovered subjects.

HR is the ratio of the hazard of recovery in each treatment group estimated from the Cox Model. The ratio is Baricitinib + RDV to Placebo + RDV.

HR for the 'Any Severity' group is the hazard ratio from the stratified Cox Model.

P-value calculated using the stratified log-rank test.

\*This analysis treats 40 baseline ordinal scale values that were truly “moderate” at baseline as their incorrectly initial entry of “severe” for summary statistics and stratified testing.

**Table S7. Serious Adverse Events Occurring in 5 or More Participants in Any Preferred Term by Treatment Group**

| MedDRA System Organ Class                            | Preferred Term                         | Baricitinib + RDV<br>(N = 507)<br>No.(%) | Placebo + RDV<br>(N = 509)<br>No.(%) |
|------------------------------------------------------|----------------------------------------|------------------------------------------|--------------------------------------|
| Any System Organ Class                               | Any Preferred Term                     | 81 (16.0)                                | 107 (21.0)                           |
| Cardiac disorders                                    | Cardiac arrest                         | 2 (0.4)                                  | 3 (0.6)                              |
| General disorders and administration site conditions | Multiple organ dysfunction syndrome    | 1 (0.2)                                  | 6 (1.2)                              |
| Infections and infestations                          | Septic shock                           | 4 (0.8)                                  | 8 (1.6)                              |
|                                                      | Pneumonia                              | 2 (0.4)                                  | 8 (1.6)                              |
|                                                      | Sepsis                                 | 1 (0.2)                                  | 5 (1.0)                              |
| Renal and urinary disorders                          | Acute kidney injury <sup>a</sup>       | 5 (1.0)                                  | 11 (2.2)                             |
|                                                      | Renal failure <sup>a</sup>             | 0 (-)                                    | 5 (1.0)                              |
| Respiratory, thoracic and mediastinal disorders      | Respiratory failure <sup>b</sup>       | 26 (5.1)                                 | 37 (7.3)                             |
|                                                      | Acute respiratory failure <sup>b</sup> | 18 (3.6)                                 | 13 (2.6)                             |
|                                                      | Acute respiratory distress syndrome    | 4 (0.8)                                  | 10 (2.0)                             |
|                                                      | Respiratory distress <sup>c</sup>      | 4 (0.8)                                  | 6 (1.2)                              |
|                                                      | Pulmonary embolism                     | 5 (1.0)                                  | 2 (0.4)                              |
|                                                      | Hypoxia <sup>c</sup>                   | 3 (0.6)                                  | 3 (0.6)                              |
|                                                      | Dyspnoea <sup>c</sup>                  | 1 (0.2)                                  | 4 (0.8)                              |
| Vascular disorders                                   | Pneumothorax                           | 1 (0.2)                                  | 4 (0.8)                              |
|                                                      | Hypotension                            | 5 (1.0)                                  | 5 (1.0)                              |
|                                                      | Shock                                  | 2 (0.4)                                  | 4 (0.8)                              |

No. = number of subjects reporting at least one event.  
<sup>a</sup> The combined number of subjects with acute kidney injury or renal failure are 5 for Baricitinib + RDV and 16 for Placebo + RDV.  
<sup>b</sup> The combined number of subjects with respiratory failure or acute respiratory failure is 44 for Baricitinib + RDV and 50 for Placebo + RDV.  
<sup>c</sup> The combined number of subjects with dyspnoea, hypoxia or respiratory distress are 8 for Baricitinib + RDV and 13 for Placebo + RDV.

**Table S8. Non-Serious Adverse Events Occurring in 5 or More Participants in Any Preferred Term by Treatment Group**

| MedDRA System Organ Class                            | Preferred Term                                    | Baricitinib + RDV<br>(N = 507)<br>No.(%) | Placebo + RDV<br>(N = 509)<br>No.(%) |
|------------------------------------------------------|---------------------------------------------------|------------------------------------------|--------------------------------------|
| Any System Organ Class                               | Any Preferred Term                                | 187 (36.9)                               | 220 (43.2)                           |
| Blood and lymphatic system disorders                 | Anaemia <sup>a</sup>                              | 24 (4.7)                                 | 31 (6.1)                             |
|                                                      | Lymphopenia <sup>b</sup>                          | 11 (2.2)                                 | 23 (4.5)                             |
| Cardiac disorders                                    | Atrial fibrillation                               | 1 (0.2)                                  | 7 (1.4)                              |
| General disorders and administration site conditions | Pyrexia                                           | 10 (2.0)                                 | 9 (1.8)                              |
| Infections and infestations                          | Pneumonia                                         | 10 (2.0)                                 | 14 (2.8)                             |
|                                                      | Pneumonia bacterial                               | 3 (0.6)                                  | 9 (1.8)                              |
|                                                      | Sepsis                                            | 3 (0.6)                                  | 7 (1.4)                              |
|                                                      | Urinary tract infection                           | 5 (1.0)                                  | 2 (0.4)                              |
|                                                      | Bacteraemia                                       | 2 (0.4)                                  | 5 (1.0)                              |
|                                                      | Septic shock                                      | 3 (0.6)                                  | 2 (0.4)                              |
| Investigations                                       | Glomerular filtration rate decreased <sup>c</sup> | 49 (9.7)                                 | 42 (8.3)                             |
|                                                      | Haemoglobin decreased <sup>a</sup>                | 30 (5.9)                                 | 30 (5.9)                             |
|                                                      | Lymphocyte count decreased <sup>b</sup>           | 23 (4.5)                                 | 35 (6.9)                             |
|                                                      | Blood glucose increased <sup>c</sup>              | 22 (4.3)                                 | 27 (5.3)                             |
|                                                      | Aspartate aminotransferase increased <sup>d</sup> | 9 (1.8)                                  | 16 (3.1)                             |
|                                                      | Blood creatinine increased <sup>c</sup>           | 10 (2.0)                                 | 8 (1.6)                              |
|                                                      | Transaminases increased <sup>d</sup>              | 6 (1.2)                                  | 10 (2.0)                             |
|                                                      | Alanine aminotransferase increased <sup>d</sup>   | 6 (1.2)                                  | 9 (1.8)                              |
|                                                      | International normalised ratio increased          | 3 (0.6)                                  | 8 (1.6)                              |
|                                                      | Blood bilirubin increased                         | 2 (0.4)                                  | 8 (1.6)                              |
|                                                      | Blood albumin decreased                           | 5 (1.0)                                  | 3 (0.6)                              |
|                                                      | Creatinine renal clearance decreased <sup>e</sup> | 3 (0.6)                                  | 3 (0.6)                              |
|                                                      | Prothrombin time prolonged                        | 4 (0.8)                                  | 1 (0.2)                              |
|                                                      | Metabolism and nutrition disorders                | Hyperglycaemia <sup>c</sup>              | 25 (4.9)                             |
| Renal and urinary disorders                          | Acute kidney injury <sup>c</sup>                  | 15 (3.0)                                 | 27 (5.3)                             |
| Respiratory, thoracic and mediastinal disorders      | Respiratory distress <sup>f</sup>                 | 9 (1.8)                                  | 9 (1.8)                              |
|                                                      | Hypoxia <sup>f</sup>                              | 6 (1.2)                                  | 4 (0.8)                              |
|                                                      | Pneumonia aspiration                              | 4 (0.8)                                  | 2 (0.4)                              |
|                                                      | Dyspnoea <sup>f</sup>                             | 3 (0.6)                                  | 3 (0.6)                              |
|                                                      | Acute respiratory failure                         | 0 (-)                                    | 6 (1.2)                              |
|                                                      | Pneumothorax                                      | 3 (0.6)                                  | 2 (0.4)                              |
| Vascular disorders                                   | Deep vein thrombosis                              | 11 (2.2)                                 | 9 (1.8)                              |
|                                                      | Hypertension                                      | 11 (2.2)                                 | 6 (1.2)                              |

| MedDRA System Organ Class | Preferred Term | Baricitinib + RDV<br>(N = 507)<br>No.(%) | Placebo + RDV<br>(N = 509)<br>No.(%) |
|---------------------------|----------------|------------------------------------------|--------------------------------------|
|                           | Hypotension    | 4 (0.8)                                  | 13 (2.6)                             |

No. = number of subjects reporting at least one event.

<sup>a</sup> The combined number of subjects with anaemia or haemoglobin decreased are 54 for Baricitinib + RDV and 59 for Placebo + RDV.

<sup>b</sup> The combined number of subjects with lymphopenia or lymphocyte count decreased are 34 for Baricitinib + RDV and 58 for Placebo + RDV.

<sup>c</sup> The combined number of subjects with glomerular filtration rate decreased, acute kidney injury, blood creatinine increased or creatinine renal clearance decreased are 71 for Baricitinib + RDV and 75 for Placebo + RDV.

<sup>d</sup> The combined number of subjects with transaminases increased, aspartate aminotransferase increased or alanine aminotransferase increased are 15 for Baricitinib + RDV and 30 for Placebo + RDV.

<sup>e</sup> The combined number of subjects with hyperglycaemia or blood glucose increased are 47 for Baricitinib + RDV and 66 for Placebo + RDV.

<sup>f</sup> The combined number of subjects with hypoxia, dyspnea or respiratory distress are 18 for Baricitinib + RDV and 16 for Placebo + RDV.

**Table S9. ACTT-2 results of Cox proportional hazards models testing for interactions between treatment effect and baseline ordinal score with respect to recovery and mortality.**

| Cox Proportional Hazards Model                                                                                                                                                                                                                                                                                                    | Group              | HR (95% CI)*     |
|-----------------------------------------------------------------------------------------------------------------------------------------------------------------------------------------------------------------------------------------------------------------------------------------------------------------------------------|--------------------|------------------|
| <b>Recovery</b>                                                                                                                                                                                                                                                                                                                   |                    |                  |
| Model 1 – Time to recovery with interaction term for treatment effect by baseline ordinal score; <ul style="list-style-type: none"> <li>Baseline ordinal score treated as continuous</li> <li>Model terms: treatment, continuous baseline ordinal score, interaction between treatment and ordinal score</li> </ul>               | Baseline Score 4   | 0.99 (0.79,1.25) |
|                                                                                                                                                                                                                                                                                                                                   | Baseline Score 5   | 1.14 (0.99,1.30) |
|                                                                                                                                                                                                                                                                                                                                   | Baseline Score 6   | 1.30 (1.07,1.59) |
|                                                                                                                                                                                                                                                                                                                                   | Baseline Score 7   | 1.49 (1.06,2.10) |
| Model 2 – Time to recovery with interaction term for treatment effect by baseline ordinal score; <ul style="list-style-type: none"> <li>Baseline ordinal scores grouped as 4/5 versus 6/7</li> <li>Model terms: treatment, grouped baseline ordinal score, interaction between treatment and grouped ordinal score</li> </ul>     | Baseline Score 4/5 | 1.13 (0.97,1.32) |
|                                                                                                                                                                                                                                                                                                                                   | Baseline Score 6/7 | 1.28 (0.97,1.70) |
| Model 3 – Time to recovery with interaction term for treatment effect by baseline ordinal score; <ul style="list-style-type: none"> <li>Baseline ordinal score treated as categorical</li> <li>Model terms: treatment, categorical baseline ordinal score, interaction between treatment and categorical ordinal score</li> </ul> | Baseline Score 4   | 0.85 (0.61,1.19) |
|                                                                                                                                                                                                                                                                                                                                   | Baseline Score 5   | 1.21 (1.01,1.44) |
|                                                                                                                                                                                                                                                                                                                                   | Baseline Score 6   | 1.43 (1.04,1.96) |
|                                                                                                                                                                                                                                                                                                                                   | Baseline Score 7   | 1.07 (0.59,1.95) |
| <b>Mortality</b>                                                                                                                                                                                                                                                                                                                  |                    |                  |
| Model 4 – Mortality with interaction term for treatment effect by baseline ordinal score; <ul style="list-style-type: none"> <li>Baseline ordinal score treated as continuous</li> <li>Model terms: treatment, continuous baseline ordinal score, interaction between treatment and ordinal score</li> </ul>                      | Baseline Score 4   | 0.27 (0.07,1.12) |
|                                                                                                                                                                                                                                                                                                                                   | Baseline Score 5   | 0.41 (0.17,0.98) |
|                                                                                                                                                                                                                                                                                                                                   | Baseline Score 6   | 0.61 (0.36,1.03) |
|                                                                                                                                                                                                                                                                                                                                   | Baseline Score 7   | 0.91 (0.44,1.86) |
| Model 5 – Mortality with interaction term for treatment effect by baseline ordinal score; <ul style="list-style-type: none"> <li>Baseline ordinal scores grouped as 4/5 versus 6/7</li> <li>Model terms: treatment, grouped baseline ordinal score, interaction between treatment and grouped ordinal score</li> </ul>            | Baseline Score 4/5 | 0.40 (0.14,1.14) |
|                                                                                                                                                                                                                                                                                                                                   | Baseline Score 6/7 | 0.77 (0.42,1.40) |
| Model 6 – Mortality with interaction term for treatment effect by baseline ordinal score; <ul style="list-style-type: none"> <li>Baseline ordinal score treated as categorical</li> <li>Model terms: treatment, categorical baseline ordinal score, interaction between treatment and categorical ordinal score</li> </ul>        | Baseline Score 4   | 1 (0,Inf)        |
|                                                                                                                                                                                                                                                                                                                                   | Baseline Score 5   | 0.40 (0.14,1.13) |
|                                                                                                                                                                                                                                                                                                                                   | Baseline Score 6   | 0.55 (0.22,1.38) |
|                                                                                                                                                                                                                                                                                                                                   | Baseline Score 7   | 0.99 (0.45,2.21) |

**\*Estimates represent model-based recovery-/hazard-rate ratios. For completeness, three approaches to modelling ordinal score were included: categorical, binary (baseline 4/5 vs baseline 6/7), or continuous.**

**Table S10. Treatment Emergent Related Grade 3-4 AEs (Serious and Non-Serious) by MedDRA System Organ Class, Preferred Term and Treatment Group**

| MedDRA System Organ Class                              | Preferred Term                       | Baricitinib + RDV<br>(N = 508)<br>No.(%) | Placebo + RDV<br>(N = 509)<br>No.(%) |
|--------------------------------------------------------|--------------------------------------|------------------------------------------|--------------------------------------|
| Any System Organ Class                                 | Any Preferred Term                   | 25 (4.9)                                 | 28 (5.5)                             |
| Blood and lymphatic system disorders                   | Lymphopenia                          | 0 (-)                                    | 1 (0.2)                              |
|                                                        | Neutropenia                          | 0 (-)                                    | 1 (0.2)                              |
| Gastrointestinal disorders                             | Nausea                               | 2 (0.4)                                  | 1 (0.2)                              |
|                                                        | Vomiting                             | 0 (-)                                    | 2 (0.4)                              |
| General disorders and administration site conditions   | Oedema peripheral                    | 0 (-)                                    | 1 (0.2)                              |
| Hepatobiliary disorders                                | Hepatitis                            | 0 (-)                                    | 1 (0.2)                              |
| Immune system disorders                                | Hypersensitivity                     | 0 (-)                                    | 1 (0.2)                              |
| Infections and infestations                            | Intervertebral discitis              | 1 (0.2)                                  | 0 (-)                                |
|                                                        | Lung abscess                         | 0 (-)                                    | 1 (0.2)                              |
|                                                        | Pneumonia                            | 0 (-)                                    | 1 (0.2)                              |
| Investigations                                         | Alanine aminotransferase increased   | 4 (0.8)                                  | 3 (0.6)                              |
|                                                        | Aspartate aminotransferase increased | 7 (1.4)                                  | 3 (0.6)                              |
|                                                        | Bilirubin conjugated increased       | 1 (0.2)                                  | 0 (-)                                |
|                                                        | Glomerular filtration rate decreased | 0 (-)                                    | 2 (0.4)                              |
|                                                        | Liver function test increased        | 1 (0.2)                                  | 0 (-)                                |
|                                                        | Lymphocyte count decreased           | 6 (1.2)                                  | 5 (1.0)                              |
|                                                        | Platelet count decreased             | 1 (0.2)                                  | 0 (-)                                |
| Renal and urinary disorders                            | Prothrombin time prolonged           | 1 (0.2)                                  | 1 (0.2)                              |
|                                                        | Transaminases increased              | 2 (0.4)                                  | 4 (0.8)                              |
|                                                        | Acute kidney injury                  | 1 (0.2)                                  | 1 (0.2)                              |
| Respiratory, thoracic and mediastinal disorders        | Pulmonary embolism                   | 4 (0.8)                                  | 0 (-)                                |
| Skin and subcutaneous tissue disorders                 | Rash                                 | 0 (-)                                    | 1 (0.2)                              |
| Vascular disorders                                     | Brachiocephalic vein thrombosis      | 0 (-)                                    | 1 (0.2)                              |
|                                                        | Deep vein thrombosis                 | 1 (0.2)                                  | 3 (0.6)                              |
|                                                        | Peripheral ischaemia                 | 0 (-)                                    | 1 (0.2)                              |
|                                                        | Thrombosis                           | 0 (-)                                    | 1 (0.2)                              |
| No. = number of subjects reporting at least one event. |                                      |                                          |                                      |



**Table S11. Treatment Emergent Grade 3-4 AEs (Serious and Non-Serious) by MedDRA System Organ Class, Preferred Term and Treatment Group**

| MedDRA System Organ Class                            | Preferred Term                     | Baricitinib + RDV<br>(N = 508)<br>No.(%) | Placebo + RDV<br>(N = 509)<br>No.(%) |
|------------------------------------------------------|------------------------------------|------------------------------------------|--------------------------------------|
| Any System Organ Class                               | Any Preferred Term                 | 207 (40.7)                               | 238 (46.8)                           |
| Blood and lymphatic system disorders                 | Anaemia                            | 25 (4.9)                                 | 33 (6.5)                             |
|                                                      | Anaemia macrocytic                 | 0 (-)                                    | 1 (0.2)                              |
|                                                      | Heparin-induced thrombocytopenia   | 1 (0.2)                                  | 1 (0.2)                              |
|                                                      | Hypercoagulation                   | 0 (-)                                    | 1 (0.2)                              |
|                                                      | Leukocytosis                       | 2 (0.4)                                  | 0 (-)                                |
|                                                      | Leukopenia                         | 1 (0.2)                                  | 1 (0.2)                              |
|                                                      | Lymphocytosis                      | 0 (-)                                    | 1 (0.2)                              |
|                                                      | Lymphopenia                        | 11 (2.2)                                 | 24 (4.7)                             |
|                                                      | Neutropenia                        | 1 (0.2)                                  | 2 (0.4)                              |
|                                                      | Sickle cell anaemia with crisis    | 1 (0.2)                                  | 0 (-)                                |
|                                                      | Thrombocytopenia                   | 0 (-)                                    | 2 (0.4)                              |
| Cardiac disorders                                    | Aortic valve stenosis              | 0 (-)                                    | 1 (0.2)                              |
|                                                      | Arrhythmia                         | 1 (0.2)                                  | 1 (0.2)                              |
|                                                      | Atrial fibrillation                | 1 (0.2)                                  | 8 (1.6)                              |
|                                                      | Atrioventricular block             | 0 (-)                                    | 1 (0.2)                              |
|                                                      | Bradycardia                        | 1 (0.2)                                  | 1 (0.2)                              |
|                                                      | Cardiac arrest                     | 1 (0.2)                                  | 1 (0.2)                              |
|                                                      | Cardiac failure                    | 2 (0.4)                                  | 0 (-)                                |
|                                                      | Myocardial ischaemia               | 0 (-)                                    | 1 (0.2)                              |
|                                                      | Pulseless electrical activity      | 1 (0.2)                                  | 1 (0.2)                              |
|                                                      | Right ventricular dysfunction      | 0 (-)                                    | 1 (0.2)                              |
|                                                      | Sinus bradycardia                  | 1 (0.2)                                  | 0 (-)                                |
|                                                      | Tachycardia                        | 0 (-)                                    | 1 (0.2)                              |
| Eye disorders                                        | Visual impairment                  | 1 (0.2)                                  | 0 (-)                                |
| Gastrointestinal disorders                           | Abdominal distension               | 0 (-)                                    | 1 (0.2)                              |
|                                                      | Abdominal pain                     | 0 (-)                                    | 1 (0.2)                              |
|                                                      | Dysphagia                          | 3 (0.6)                                  | 0 (-)                                |
|                                                      | Gastrointestinal haemorrhage       | 0 (-)                                    | 2 (0.4)                              |
|                                                      | Ileus                              | 0 (-)                                    | 3 (0.6)                              |
|                                                      | Lower gastrointestinal haemorrhage | 0 (-)                                    | 1 (0.2)                              |
|                                                      | Nausea                             | 2 (0.4)                                  | 1 (0.2)                              |
|                                                      | Pancreatitis acute                 | 1 (0.2)                                  | 0 (-)                                |
|                                                      | Toothache                          | 1 (0.2)                                  | 0 (-)                                |
|                                                      | Vomiting                           | 0 (-)                                    | 2 (0.4)                              |
| General disorders and administration site conditions | Asthenia                           | 1 (0.2)                                  | 0 (-)                                |

| MedDRA System Organ Class   | Preferred Term                        | Baricitinib + RDV<br>(N = 508)<br>No.(%) | Placebo + RDV<br>(N = 509)<br>No.(%) |
|-----------------------------|---------------------------------------|------------------------------------------|--------------------------------------|
|                             | Chest pain                            | 3 (0.6)                                  | 0 (-)                                |
|                             | Complication associated with device   | 0 (-)                                    | 1 (0.2)                              |
|                             | Injection site induration             | 0 (-)                                    | 1 (0.2)                              |
|                             | Multiple organ dysfunction syndrome   | 2 (0.4)                                  | 4 (0.8)                              |
|                             | Non-cardiac chest pain                | 1 (0.2)                                  | 0 (-)                                |
|                             | Oedema peripheral                     | 0 (-)                                    | 1 (0.2)                              |
|                             | Pain                                  | 1 (0.2)                                  | 1 (0.2)                              |
|                             | Pyrexia                               | 9 (1.8)                                  | 9 (1.8)                              |
| Hepatobiliary disorders     | Hepatic haemorrhage                   | 0 (-)                                    | 1 (0.2)                              |
|                             | Hepatitis                             | 0 (-)                                    | 1 (0.2)                              |
|                             | Hyperbilirubinaemia                   | 2 (0.4)                                  | 1 (0.2)                              |
|                             | Hypertransaminaemia                   | 1 (0.2)                                  | 0 (-)                                |
|                             | Liver injury                          | 0 (-)                                    | 1 (0.2)                              |
| Immune system disorders     | Cytokine storm                        | 1 (0.2)                                  | 1 (0.2)                              |
|                             | Hypersensitivity                      | 1 (0.2)                                  | 1 (0.2)                              |
| Infections and infestations | Abscess                               | 0 (-)                                    | 1 (0.2)                              |
|                             | Aspergillus infection                 | 1 (0.2)                                  | 1 (0.2)                              |
|                             | Bacteraemia                           | 2 (0.4)                                  | 5 (1.0)                              |
|                             | Bronchopulmonary aspergillosis        | 1 (0.2)                                  | 1 (0.2)                              |
|                             | Candida infection                     | 1 (0.2)                                  | 0 (-)                                |
|                             | Candida sepsis                        | 0 (-)                                    | 1 (0.2)                              |
|                             | Clostridium difficile infection       | 2 (0.4)                                  | 0 (-)                                |
|                             | Enterococcal infection                | 0 (-)                                    | 1 (0.2)                              |
|                             | Fungaemia                             | 1 (0.2)                                  | 0 (-)                                |
|                             | Fungal infection                      | 1 (0.2)                                  | 0 (-)                                |
|                             | Intervertebral discitis               | 1 (0.2)                                  | 0 (-)                                |
|                             | Klebsiella infection                  | 0 (-)                                    | 1 (0.2)                              |
|                             | Lower respiratory tract infection     | 1 (0.2)                                  | 0 (-)                                |
|                             | Lung abscess                          | 0 (-)                                    | 1 (0.2)                              |
|                             | Mastoiditis                           | 0 (-)                                    | 1 (0.2)                              |
|                             | Oesophageal candidiasis               | 1 (0.2)                                  | 0 (-)                                |
|                             | Pneumonia                             | 12 (2.4)                                 | 21 (4.1)                             |
|                             | Pneumonia bacterial                   | 3 (0.6)                                  | 9 (1.8)                              |
|                             | Pneumonia Escherichia                 | 0 (-)                                    | 1 (0.2)                              |
|                             | Pneumonia klebsiella                  | 0 (-)                                    | 1 (0.2)                              |
|                             | Pneumonia staphylococcal              | 0 (-)                                    | 3 (0.6)                              |
|                             | Pneumonia streptococcal               | 0 (-)                                    | 1 (0.2)                              |
|                             | Prostatic abscess                     | 1 (0.2)                                  | 0 (-)                                |
|                             | Respiratory tract infection bacterial | 0 (-)                                    | 1 (0.2)                              |

| MedDRA System Organ Class                      | Preferred Term                                  | Baricitinib + RDV<br>(N = 508)<br>No.(%) | Placebo + RDV<br>(N = 509)<br>No.(%) |
|------------------------------------------------|-------------------------------------------------|------------------------------------------|--------------------------------------|
|                                                | Sepsis                                          | 4 (0.8)                                  | 11 (2.2)                             |
|                                                | Septic shock                                    | 5 (1.0)                                  | 9 (1.8)                              |
|                                                | Sinusitis                                       | 0 (-)                                    | 1 (0.2)                              |
|                                                | Staphylococcal bacteraemia                      | 0 (-)                                    | 1 (0.2)                              |
|                                                | Staphylococcal infection                        | 1 (0.2)                                  | 1 (0.2)                              |
|                                                | Systemic candida                                | 0 (-)                                    | 1 (0.2)                              |
|                                                | Upper respiratory tract infection bacterial     | 0 (-)                                    | 2 (0.4)                              |
|                                                | Urinary tract infection                         | 6 (1.2)                                  | 2 (0.4)                              |
|                                                | Urinary tract infection fungal                  | 1 (0.2)                                  | 0 (-)                                |
|                                                | Urosepsis                                       | 0 (-)                                    | 1 (0.2)                              |
|                                                | Vascular device infection                       | 2 (0.4)                                  | 1 (0.2)                              |
|                                                | Vulvovaginal mycotic infection                  | 0 (-)                                    | 1 (0.2)                              |
| Injury, poisoning and procedural complications | Endotracheal intubation complication            | 1 (0.2)                                  | 1 (0.2)                              |
|                                                | Fall                                            | 0 (-)                                    | 1 (0.2)                              |
|                                                | Overdose                                        | 0 (-)                                    | 1 (0.2)                              |
|                                                | Procedural hypotension                          | 1 (0.2)                                  | 0 (-)                                |
| Investigations                                 | Activated partial thromboplastin time prolonged | 1 (0.2)                                  | 1 (0.2)                              |
|                                                | Alanine aminotransferase increased              | 6 (1.2)                                  | 12 (2.4)                             |
|                                                | Aspartate aminotransferase increased            | 9 (1.8)                                  | 18 (3.5)                             |
|                                                | Bacterial test positive                         | 1 (0.2)                                  | 0 (-)                                |
|                                                | Bilirubin conjugated increased                  | 1 (0.2)                                  | 0 (-)                                |
|                                                | Blood albumin decreased                         | 5 (1.0)                                  | 3 (0.6)                              |
|                                                | Blood alkaline phosphatase increased            | 0 (-)                                    | 2 (0.4)                              |
|                                                | Blood bilirubin increased                       | 2 (0.4)                                  | 8 (1.6)                              |
|                                                | Blood calcium decreased                         | 1 (0.2)                                  | 0 (-)                                |
|                                                | Blood creatine phosphokinase increased          | 2 (0.4)                                  | 2 (0.4)                              |
|                                                | Blood creatinine decreased                      | 2 (0.4)                                  | 1 (0.2)                              |
|                                                | Blood creatinine increased                      | 10 (2.0)                                 | 9 (1.8)                              |
|                                                | Blood glucose decreased                         | 0 (-)                                    | 1 (0.2)                              |
|                                                | Blood glucose increased                         | 22 (4.3)                                 | 27 (5.3)                             |
|                                                | Blood phosphorus decreased                      | 0 (-)                                    | 1 (0.2)                              |
|                                                | Blood pressure increased                        | 1 (0.2)                                  | 2 (0.4)                              |
|                                                | Blood pressure systolic increased               | 0 (-)                                    | 1 (0.2)                              |
|                                                | Blood sodium increased                          | 1 (0.2)                                  | 0 (-)                                |
|                                                | Blood triglycerides increased                   | 1 (0.2)                                  | 2 (0.4)                              |
|                                                | Candida test positive                           | 1 (0.2)                                  | 0 (-)                                |
|                                                | Creatinine renal clearance decreased            | 3 (0.6)                                  | 3 (0.6)                              |
|                                                | Electrocardiogram QT prolonged                  | 1 (0.2)                                  | 1 (0.2)                              |
|                                                | Fibrin D dimer increased                        | 0 (-)                                    | 1 (0.2)                              |

| MedDRA System Organ Class                       | Preferred Term                           | Baricitinib + RDV<br>(N = 508)<br>No.(%) | Placebo + RDV<br>(N = 509)<br>No.(%) |
|-------------------------------------------------|------------------------------------------|------------------------------------------|--------------------------------------|
|                                                 | Glomerular filtration rate decreased     | 49 (9.6)                                 | 42 (8.3)                             |
|                                                 | Glomerular filtration rate increased     | 0 (-)                                    | 1 (0.2)                              |
|                                                 | Haemoglobin decreased                    | 30 (5.9)                                 | 30 (5.9)                             |
|                                                 | Haemophilus test positive                | 0 (-)                                    | 1 (0.2)                              |
|                                                 | International normalised ratio increased | 3 (0.6)                                  | 8 (1.6)                              |
|                                                 | Liver function test increased            | 1 (0.2)                                  | 0 (-)                                |
|                                                 | Lymphocyte count decreased               | 24 (4.7)                                 | 35 (6.9)                             |
|                                                 | Neutrophil count decreased               | 1 (0.2)                                  | 0 (-)                                |
|                                                 | Platelet count decreased                 | 2 (0.4)                                  | 1 (0.2)                              |
|                                                 | Prothrombin time prolonged               | 4 (0.8)                                  | 1 (0.2)                              |
|                                                 | Serratia test positive                   | 0 (-)                                    | 1 (0.2)                              |
|                                                 | Sputum culture positive                  | 1 (0.2)                                  | 0 (-)                                |
|                                                 | Transaminases increased                  | 6 (1.2)                                  | 10 (2.0)                             |
|                                                 | Troponin increased                       | 1 (0.2)                                  | 1 (0.2)                              |
|                                                 | White blood cell count decreased         | 0 (-)                                    | 1 (0.2)                              |
| Metabolism and nutrition disorders              | Acidosis                                 | 1 (0.2)                                  | 4 (0.8)                              |
|                                                 | Alkalosis                                | 2 (0.4)                                  | 0 (-)                                |
|                                                 | Decreased appetite                       | 1 (0.2)                                  | 0 (-)                                |
|                                                 | Dehydration                              | 1 (0.2)                                  | 0 (-)                                |
|                                                 | Diabetic ketoacidosis                    | 0 (-)                                    | 1 (0.2)                              |
|                                                 | Fluid overload                           | 0 (-)                                    | 2 (0.4)                              |
|                                                 | Hyperglycaemia                           | 25 (4.9)                                 | 40 (7.9)                             |
|                                                 | Hyperkalaemia                            | 0 (-)                                    | 2 (0.4)                              |
|                                                 | Hypernatraemia                           | 1 (0.2)                                  | 1 (0.2)                              |
|                                                 | Hypertriglyceridaemia                    | 1 (0.2)                                  | 0 (-)                                |
|                                                 | Hypoalbuminaemia                         | 2 (0.4)                                  | 1 (0.2)                              |
|                                                 | Hypocalcaemia                            | 0 (-)                                    | 3 (0.6)                              |
|                                                 | Hypoglycaemia                            | 1 (0.2)                                  | 1 (0.2)                              |
|                                                 | Hypokalaemia                             | 0 (-)                                    | 1 (0.2)                              |
|                                                 | Hypophosphataemia                        | 0 (-)                                    | 1 (0.2)                              |
|                                                 | Metabolic acidosis                       | 0 (-)                                    | 2 (0.4)                              |
|                                                 | Metabolic alkalosis                      | 0 (-)                                    | 4 (0.8)                              |
| Musculoskeletal and connective tissue disorders | Compartment syndrome                     | 0 (-)                                    | 1 (0.2)                              |
|                                                 | Diabetic amyotrophy                      | 1 (0.2)                                  | 0 (-)                                |
|                                                 | Haematoma muscle                         | 0 (-)                                    | 1 (0.2)                              |
| Nervous system disorders                        | Cerebrovascular accident                 | 1 (0.2)                                  | 2 (0.4)                              |
|                                                 | Encephalopathy                           | 3 (0.6)                                  | 3 (0.6)                              |
|                                                 | Guillain-Barre syndrome                  | 1 (0.2)                                  | 0 (-)                                |
|                                                 | Haemorrhage intracranial                 | 0 (-)                                    | 1 (0.2)                              |

| MedDRA System Organ Class                       | Preferred Term                      | Baricitinib + RDV<br>(N = 508)<br>No.(%) | Placebo + RDV<br>(N = 509)<br>No.(%) |
|-------------------------------------------------|-------------------------------------|------------------------------------------|--------------------------------------|
|                                                 | Headache                            | 1 (0.2)                                  | 1 (0.2)                              |
|                                                 | Metabolic encephalopathy            | 1 (0.2)                                  | 0 (-)                                |
|                                                 | Nervous system disorder             | 1 (0.2)                                  | 0 (-)                                |
|                                                 | Presyncope                          | 0 (-)                                    | 1 (0.2)                              |
|                                                 | Seizure                             | 1 (0.2)                                  | 0 (-)                                |
|                                                 | Sensory loss                        | 0 (-)                                    | 1 (0.2)                              |
|                                                 | Vocal cord paralysis                | 0 (-)                                    | 1 (0.2)                              |
| Psychiatric disorders                           | Acute psychosis                     | 1 (0.2)                                  | 0 (-)                                |
|                                                 | Agitation                           | 1 (0.2)                                  | 0 (-)                                |
|                                                 | Anxiety                             | 0 (-)                                    | 1 (0.2)                              |
|                                                 | Delirium                            | 0 (-)                                    | 3 (0.6)                              |
|                                                 | Intensive care unit delirium        | 1 (0.2)                                  | 0 (-)                                |
|                                                 | Mental status changes               | 1 (0.2)                                  | 0 (-)                                |
| Renal and urinary disorders                     | Acute kidney injury                 | 20 (3.9)                                 | 36 (7.1)                             |
|                                                 | Azotaemia                           | 0 (-)                                    | 1 (0.2)                              |
|                                                 | Chronic kidney disease              | 0 (-)                                    | 1 (0.2)                              |
|                                                 | Haematuria                          | 0 (-)                                    | 1 (0.2)                              |
|                                                 | Pollakiuria                         | 0 (-)                                    | 1 (0.2)                              |
|                                                 | Renal failure                       | 0 (-)                                    | 6 (1.2)                              |
|                                                 | Urinary retention                   | 1 (0.2)                                  | 2 (0.4)                              |
|                                                 | Urinary tract obstruction           | 1 (0.2)                                  | 0 (-)                                |
| Respiratory, thoracic and mediastinal disorders | Acute respiratory distress syndrome | 5 (1.0)                                  | 6 (1.2)                              |
|                                                 | Acute respiratory failure           | 13 (2.6)                                 | 10 (2.0)                             |
|                                                 | Asthma                              | 2 (0.4)                                  | 0 (-)                                |
|                                                 | Bronchospasm                        | 0 (-)                                    | 2 (0.4)                              |
|                                                 | Dyspnoea                            | 4 (0.8)                                  | 7 (1.4)                              |
|                                                 | Epistaxis                           | 0 (-)                                    | 2 (0.4)                              |
|                                                 | Haemoptysis                         | 0 (-)                                    | 1 (0.2)                              |
|                                                 | Haemothorax                         | 0 (-)                                    | 1 (0.2)                              |
|                                                 | Hypoxia                             | 8 (1.6)                                  | 7 (1.4)                              |
|                                                 | Lung infiltration                   | 1 (0.2)                                  | 0 (-)                                |
|                                                 | Oropharyngeal pain                  | 1 (0.2)                                  | 0 (-)                                |
|                                                 | Pneumomediastinum                   | 0 (-)                                    | 1 (0.2)                              |
|                                                 | Pneumonia aspiration                | 4 (0.8)                                  | 2 (0.4)                              |
|                                                 | Pneumothorax                        | 4 (0.8)                                  | 6 (1.2)                              |
|                                                 | Pulmonary embolism                  | 5 (1.0)                                  | 1 (0.2)                              |
|                                                 | Respiratory acidosis                | 0 (-)                                    | 1 (0.2)                              |
|                                                 | Respiratory disorder                | 0 (-)                                    | 1 (0.2)                              |
|                                                 | Respiratory distress                | 12 (2.4)                                 | 14 (2.8)                             |

| MedDRA System Organ Class                              | Preferred Term                  | Baricitinib + RDV<br>(N = 508)<br>No.(%) | Placebo + RDV<br>(N = 509)<br>No.(%) |
|--------------------------------------------------------|---------------------------------|------------------------------------------|--------------------------------------|
|                                                        | Respiratory failure             | 19 (3.7)                                 | 32 (6.3)                             |
|                                                        | Respiratory tract oedema        | 0 (-)                                    | 1 (0.2)                              |
|                                                        | Tachypnoea                      | 0 (-)                                    | 1 (0.2)                              |
| Skin and subcutaneous tissue disorders                 | Angioedema                      | 0 (-)                                    | 1 (0.2)                              |
|                                                        | Decubitus ulcer                 | 3 (0.6)                                  | 1 (0.2)                              |
|                                                        | Rash                            | 0 (-)                                    | 2 (0.4)                              |
| Surgical and medical procedures                        | Extubation                      | 0 (-)                                    | 1 (0.2)                              |
| Vascular disorders                                     | Brachiocephalic vein thrombosis | 0 (-)                                    | 1 (0.2)                              |
|                                                        | Deep vein thrombosis            | 11 (2.2)                                 | 7 (1.4)                              |
|                                                        | Distributive shock              | 1 (0.2)                                  | 4 (0.8)                              |
|                                                        | Dry gangrene                    | 0 (-)                                    | 1 (0.2)                              |
|                                                        | Embolism venous                 | 1 (0.2)                                  | 1 (0.2)                              |
|                                                        | Essential hypertension          | 0 (-)                                    | 1 (0.2)                              |
|                                                        | Hypertension                    | 11 (2.2)                                 | 6 (1.2)                              |
|                                                        | Hypotension                     | 9 (1.8)                                  | 18 (3.5)                             |
|                                                        | Peripheral artery occlusion     | 1 (0.2)                                  | 0 (-)                                |
|                                                        | Peripheral ischaemia            | 1 (0.2)                                  | 1 (0.2)                              |
|                                                        | Phlebitis                       | 0 (-)                                    | 1 (0.2)                              |
|                                                        | Shock                           | 3 (0.6)                                  | 4 (0.8)                              |
|                                                        | Thrombophlebitis                | 1 (0.2)                                  | 0 (-)                                |
|                                                        | Thrombophlebitis superficial    | 1 (0.2)                                  | 0 (-)                                |
|                                                        | Thrombosis                      | 2 (0.4)                                  | 2 (0.4)                              |
| No. = number of subjects reporting at least one event. |                                 |                                          |                                      |

**Table S12. Post-randomization corticosteroid use**

| <b>Percent post-randomization corticosteroid use</b> |                  |                     |                       |
|------------------------------------------------------|------------------|---------------------|-----------------------|
| Baseline category                                    | Bari + RDV (n/N) | Placebo + RDV (n/N) | Difference (95% CI)   |
| Overall                                              | 10.9% (56/515)   | 12.9% (67/518)      | -2.1% (-6.0%, 1.9%)   |
| OS-4                                                 | 1.4% (1/70)      | 1.4% (1/72)         | 0.04% (-3.8%, 3.9%)   |
| OS-5                                                 | 10.1% (29/288)   | 9.4% (26/276)       | 0.6% (-4.2%, 5.5%)    |
| OS-6                                                 | 11.7% (12/103)   | 21.2% (24/113)      | -9.6% (-19.3%, 0.2%)  |
| OS-7                                                 | 25.9% (14/54)    | 28.1% (16/57)       | -2.1% (-18.7%, 14.4%) |
| <b>Post-randomization dexamethasone use</b>          |                  |                     |                       |
| Baseline category                                    | Bari + RDV (n/N) | Placebo + RDV (n/N) | Difference (95% CI)   |
| Overall                                              | 6.0% (31/515)    | 7.1% (37/518)       | -1.1% (-4.1%, 1.9%)   |
| OS-4                                                 | 0 (0/70)         | 0 (0/72)            | NA                    |
| OS-5                                                 | 6.9% (20/288)    | 6.5% (18/276)       | 0.4% (-3.7%, 4.6%)    |
| OS-6                                                 | 5.8% (6/103)     | 11.5% (13/113)      | -5.7% (-13.1%, 1.7%)  |
| OS-7                                                 | 9.3% (5/54)      | 10.5 (6/56)         | -1.3% (-12.4%, 9.8%)  |

**Table S13. Sensitivity analysis of time to recovery with random effects for site**

|                                       |                                  |          |
|---------------------------------------|----------------------------------|----------|
| <b>Random effects model estimates</b> | 1.1564<br>(95% CI: 1.009, 1.325) | p=0.0364 |
| <b>Original model estimates</b>       | 1.1567<br>(95% CI: 1.010, 1.325) | p=0.0354 |

**Table S14. Primary Analysis of Time to Recovery by Baseline Ordinal Score at Final Alpha Spending Look**

| Baseline Ordinal Score                | Overall                 |                     | 4                 |                    | 5                 |                     | 6                 |                     | 7                 |                    |
|---------------------------------------|-------------------------|---------------------|-------------------|--------------------|-------------------|---------------------|-------------------|---------------------|-------------------|--------------------|
|                                       | Placebo (n=518)         | Baricitinib (n=516) | Placebo (n=73)    | Baricitinib (n=71) | Placebo (n=259)   | Baricitinib (n=271) | Placebo (n=130)   | Baricitinib (n=120) | Placebo (n=56)    | Baricitinib (n=54) |
| <b>Days to Recovery</b>               |                         |                     |                   |                    |                   |                     |                   |                     |                   |                    |
| Number of Recoveries                  | 390                     | 427                 | 66                | 67                 | 222               | 240                 | 83                | 98                  | 19                | 22                 |
| Median (95% CI)                       | 8 (7, 9)                | 7 (6, 8)            | 4 (4, 6)          | 5 (4, 6)           | 6 (5, 7)          | 5 (5, 6)            | 15 (11, 19)       | 10 (8, 11)          | NE*               | NE*                |
| Recovery Rate Ratio (95% CI); p-value | 1.17 (1.02, 1.34); 0.02 |                     | 0.87 (0.62, 1.22) |                    | 1.16 (0.97, 1.40) |                     | 1.56 (1.16, 2.09) |                     | 1.18 (0.64, 2.18) |                    |

\*Indicates that the value was not estimable.

Note that data cleaning was ongoing during the final alpha spending look. One participant included in the baricitinib+RDV arm during the final alpha spending look was subsequently determined to be ineligible and data cleaning related to baseline ordinal scores occurred after the final alpha spending look.



**Table S15. Restricted Mean Survival Time Analysis**

|                     |                         |                           |     |      | Restricted Mean Survival Time (Days) |              | Difference |              |
|---------------------|-------------------------|---------------------------|-----|------|--------------------------------------|--------------|------------|--------------|
| Analysis Population | Actual Disease Severity | Treatment Group           | n   | Tau  | Estimate                             | 95% CI       | Estimate   | 95% CI       |
| Recovery            | Ordinal Score 4         | Baricitinib + RDV (N=70)  | 67  | 22.0 | 6.44                                 | 5.31, 7.57   | 0.66       | -0.81, 2.14  |
|                     |                         | Placebo + RDV (N=72)      | 69  | 22.0 | 5.77                                 | 4.82, 6.72   |            |              |
|                     | Ordinal Score 5         | Baricitinib + RDV (N=288) | 262 | 30.0 | 7.73                                 | 6.94, 8.53   | -1.29      | -2.55, -0.02 |
|                     |                         | Placebo + RDV (N=276)     | 243 | 30.0 | 9.02                                 | 8.04, 10.01  |            |              |
|                     | Ordinal Score 6         | Baricitinib + RDV (N=103) | 82  | 30.0 | 14.26                                | 12.50, 16.03 | -3.74      | -6.29, -1.19 |
|                     |                         | Placebo + RDV (N=113)     | 73  | 30.0 | 18.00                                | 16.16, 19.84 |            |              |
|                     | Ordinal Score 7         | Baricitinib + RDV (N=54)  | 22  | 30.0 | 24.46                                | 22.41, 26.51 | -0.38      | -3.30, 2.54  |
|                     |                         | Placebo + RDV (N=57)      | 21  | 30.0 | 24.84                                | 22.77, 26.91 |            |              |
|                     | Overall                 | Baricitinib + RDV (N=515) | 433 | 30.0 | 10.67                                | 9.87, 11.46  | -1.54      | -2.73, -0.36 |
|                     |                         | Placebo + RDV (N=518)     | 406 | 30.0 | 12.21                                | 11.33, 13.09 |            |              |
| Mortality           | Ordinal Score 4         | Baricitinib + RDV (N=70)  | 0   | -    | -                                    | -            | -          | -            |
|                     |                         | Placebo + RDV (N=72)      | 0   | -    | -                                    | -            |            |              |

|                     |                         |                           |    |      | Restricted Mean Survival Time (Days) |              | Difference |             |
|---------------------|-------------------------|---------------------------|----|------|--------------------------------------|--------------|------------|-------------|
| Analysis Population | Actual Disease Severity | Treatment Group           | n  | Tau  | Estimate                             | 95% CI       | Estimate   | 95% CI      |
|                     | Ordinal Score 5         | Baricitinib + RDV (N=288) | 5  | 28.0 | 27.77                                | 27.57, 27.98 | 0.32       | -0.07, 0.71 |
|                     |                         | Placebo + RDV (N=276)     | 12 | 28.0 | 27.45                                | 27.12, 27.78 |            |             |
|                     | Ordinal Score 6         | Baricitinib + RDV (N=103) | 7  | 28.0 | 27.28                                | 26.65, 27.92 | 0.58       | -0.46, 1.62 |
|                     |                         | Placebo + RDV (N=113)     | 13 | 28.0 | 26.71                                | 25.88, 27.53 |            |             |
|                     | Ordinal Score 7         | Baricitinib + RDV (N=54)  | 12 | 28.0 | 25.30                                | 23.59, 27.02 | 0.32       | -2.07, 2.72 |
|                     |                         | Placebo + RDV (N=57)      | 12 | 28.0 | 24.98                                | 23.31, 26.65 |            |             |
|                     | Any Severity            | Baricitinib + RDV (N=515) | 24 | 28.0 | 27.44                                | 27.18, 27.70 | 0.34       | -0.07, 0.75 |
|                     |                         | Placebo + RDV (N=518)     | 37 | 28.0 | 27.10                                | 26.78, 27.42 |            |             |

N = Number of subjects in specified treatment group and disease severity.  
 n = Number of recoveries/deaths.  
 Difference is the difference in the restricted mean survival time between Baricitinib + RDV and Placebo + RDV.

**Table S16. Time to Recovery by Treatment Group and Baseline Ordinal Score: Fine-Gray Modeling**

|                                                                                                                                                                        |                                        | <b>HR</b>       |               |
|------------------------------------------------------------------------------------------------------------------------------------------------------------------------|----------------------------------------|-----------------|---------------|
| <b>Model</b>                                                                                                                                                           | <b>Baseline Clinical Ordinal Score</b> | <b>Estimate</b> | <b>95% CI</b> |
| Fine-Gray                                                                                                                                                              | Baseline Clinical Status Score 7       | 1.08            | 0.60, 1.94    |
|                                                                                                                                                                        | Baseline Clinical Status Score 6       | 1.51            | 1.11, 2.06    |
|                                                                                                                                                                        | Baseline Clinical Status Score 5       | 1.17            | 1.00, 1.37    |
|                                                                                                                                                                        | Baseline Clinical Status Score 4       | 0.88            | 0.65, 1.18    |
|                                                                                                                                                                        | Overall                                | 1.16            | 1.02, 1.31    |
| <p>HR is the ratio of the hazard of recovery in each treatment group estimated from the Cox Model.<br/>           The ratio is Baricitinib + RDV to Placebo + RDV.</p> |                                        |                 |               |



**Figure S2. Kaplan–Meier Estimates of Survival by Baseline Ordinal Scale.**

Panel A shows the estimates (and 95% confidence bands) in the overall population, Panel B in those with baseline ordinal scale = 4, Panel C in those with baseline ordinal scale = 5, Panel D in those with baseline ordinal scale = 6, and Panel E in those with baseline ordinal scale = 7.

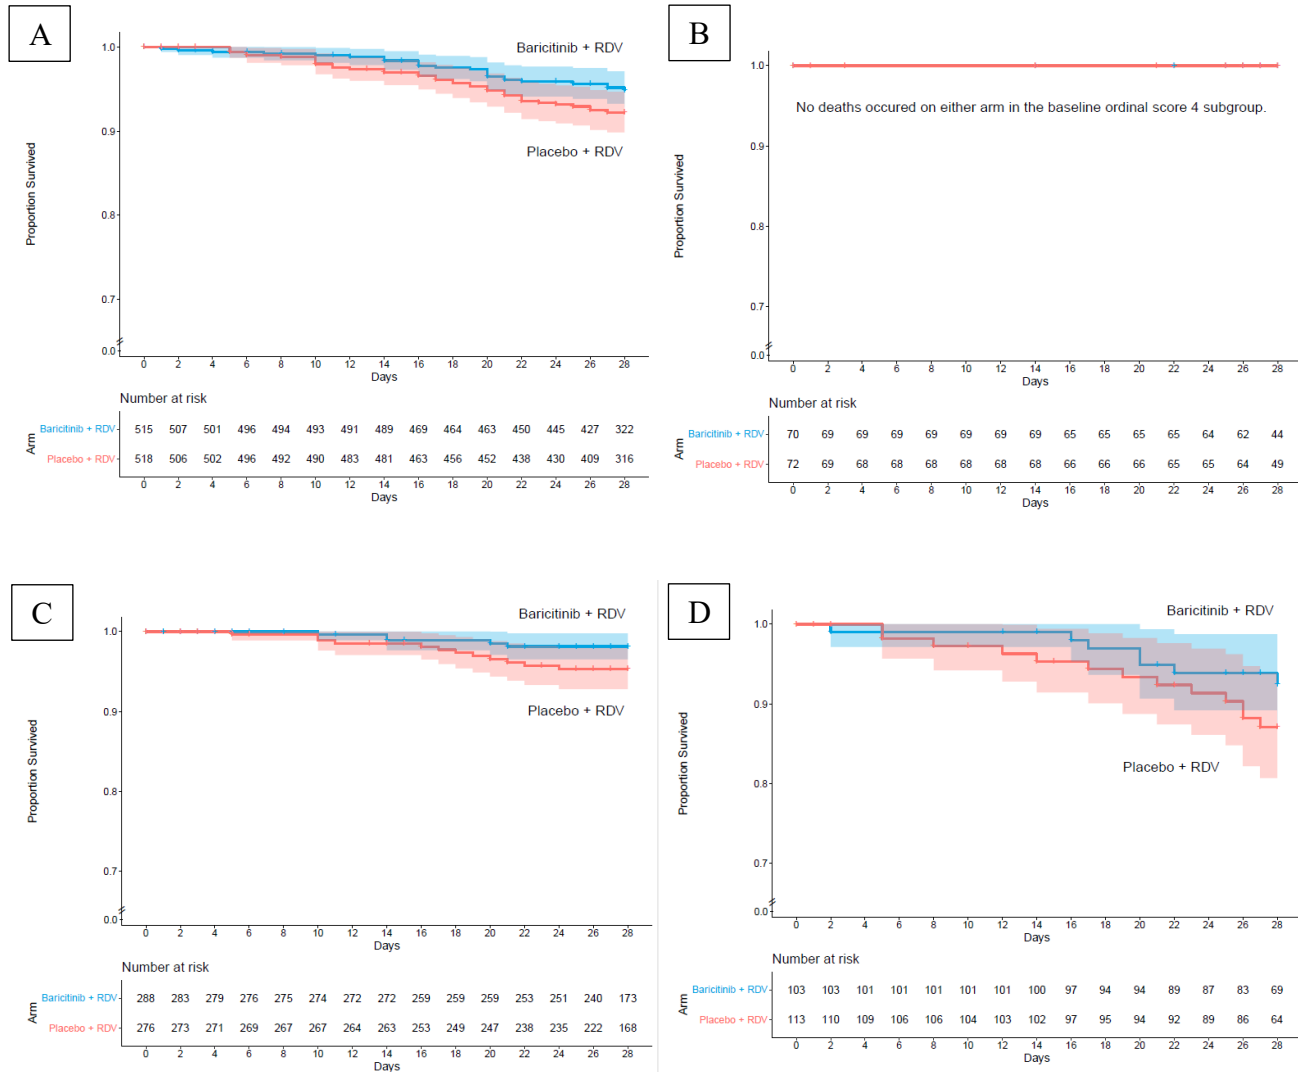

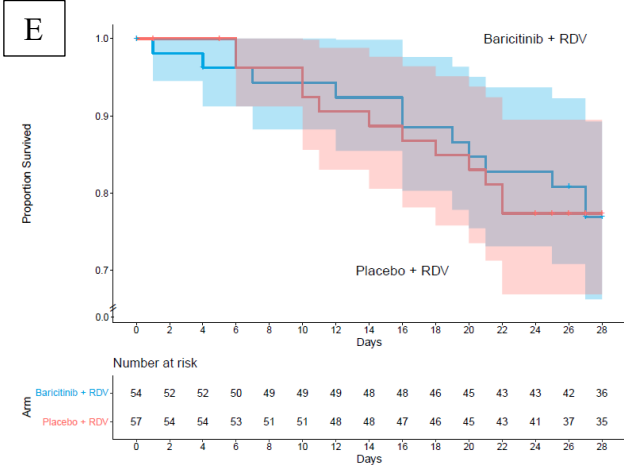

Note: the widths of confidence intervals have not been adjusted for multiplicity and cannot be used to infer treatment effects.

**References:**

1. Royal College of Physicians. National Early Warning Score (NEWS) 2 2017 [Available from: <https://www.rcplondon.ac.uk/projects/outputs/national-early-warning-score-news-2>].
2. King JC, Beigel JH, Ison MG, Rothman RE, Uyeki TM, Walker RE, et al. Clinical Development of Therapeutic Agents for Hospitalized Patients With Influenza: Challenges and Innovations. *Open Forum Infect Dis.* 2019;6(4):ofz137.
