# Supplementary material
Source: PubMed Central journal article supplement (PMC7745180)
Supplement: NEJMoa2031994_data-sharing.pdf [file NEJMoa2031994_data-sharing.pdf]

## Data Sharing Statement

Kalil AC, Patterson TF, Mehta AK, et al. Baricitinib plus Remdesivir for Hospitalized Adults with Covid-19. N Engl J Med. DOI: 10.1056/NEJMoa2031994.

| Question                                                            | Authors' Response                                                  |
|---------------------------------------------------------------------|--------------------------------------------------------------------|
| Will the data collected for your study be made available to others? | Yes                                                                |
| Would you like to offer context for your decision?                  | —                                                                  |
| Which data?                                                         | Complete de-identified patient data set                            |
| Additional information about data                                   | —                                                                  |
| How or where can the data be obtained?                              | <a href="http://www.clinicaltrials.gov">www.clinicaltrials.gov</a> |
| When will data availability begin?                                  | With publication                                                   |
| When will data availability end?                                    | —                                                                  |
| Will any supporting documents be available?                         | —                                                                  |
| Which supporting documents?                                         | —                                                                  |
| Additional information about supporting documents                   | —                                                                  |
| How or where can supporting documents be obtained?                  | —                                                                  |
| When will supporting documents availability begin?                  | —                                                                  |
| When will supporting documents availability end?                    | —                                                                  |
| To whom will data be available?                                     | —                                                                  |
| For what type of analysis or purpose?                               | —                                                                  |
| By what mechanism?                                                  | —                                                                  |
| Any other restrictions?                                             | —                                                                  |
| Additional information                                              | —                                                                  |

This statement was posted on December 11, 2020, at NEJM.org.
